# Supplementary material
Source: PubMed Central journal article supplement (PMC5493039)
Supplement: NIHMS867136-supplement.pdf [file NIHMS867136-supplement.pdf]

# Supplementary Data

## *Exploring the influence of indololactone structure on selectivity for binding to the C1 domains of PKC $\alpha$ , PKC $\epsilon$ , and RasGRP*

Eleonora Elhalem<sup>a</sup>, Lucía Gandolfi Donadío<sup>a</sup>, Xiaoling Zhou<sup>b</sup>, Nancy E. Lewin<sup>b</sup>, Lia C. García<sup>a</sup>, Christopher C. Lai<sup>c</sup>, James A. Kelley<sup>c</sup>, Megan L. Peach<sup>d</sup>, Peter M. Blumberg<sup>b</sup> and Maria J. Comin<sup>a\*</sup>

<sup>a</sup>*Laboratory of Organic Synthesis, Center of Research and Development in Chemistry, National Institute of Industrial Technology, Buenos Aires, Argentina;*

<sup>b</sup>*Laboratory of Cancer Biology and Genetics, Center for Cancer Research, National Cancer Institute, Bethesda, MD 20892, USA;*

<sup>c</sup>*Chemical Biology Laboratory, Center for Cancer Research, National Cancer Institute at Frederick, National Institutes of Health, Frederick, MD 21702, U.S.A.*

<sup>d</sup>*Basic Science Program, Leidos Biomedical Research Inc., Chemical Biology Laboratory, Frederick National Laboratory for Cancer Research, National Institutes of Health, Frederick, MD 21702, U.S.A.*

\* Corresponding author. Tel.: +54-11-4724-6289; fax: +54-11-4724-6289; email:

jcomin@inti.gob.ar.

## Table of Contents

|                                               |     |
|-----------------------------------------------|-----|
| <sup>1</sup> H-NMR 10 Spectra.....            | S4  |
| <sup>13</sup> C-NMR 10 Spectra.....           | S4  |
| <sup>1</sup> H-NMR 14 <i>E</i> Spectra .....  | S5  |
| <sup>13</sup> C-NMR 14 <i>E</i> Spectra ..... | S5  |
| <sup>1</sup> H-NMR 14 <i>Z</i> Spectra .....  | S6  |
| <sup>13</sup> C-NMR 14 <i>Z</i> Spectra ..... | S6  |
| <sup>1</sup> H-NMR 15 <i>E</i> Spectra .....  | S7  |
| <sup>13</sup> C-NMR 15 <i>E</i> Spectra ..... | S7  |
| <sup>1</sup> H-NMR 15 <i>Z</i> Spectra .....  | S8  |
| <sup>13</sup> C-NMR 15 <i>Z</i> Spectra ..... | S8  |
| <sup>1</sup> H-NMR 16 Spectra.....            | S9  |
| <sup>13</sup> C-NMR 16 Spectra.....           | S9  |
| <sup>1</sup> H-NMR 26 Spectra.....            | S10 |
| <sup>13</sup> C-NMR 26 Spectra.....           | S10 |
| <sup>1</sup> H-NMR 27 Spectra.....            | S11 |
| <sup>13</sup> C-NMR 27 Spectra.....           | S11 |
| <sup>1</sup> H-NMR 29 Spectra.....            | S12 |
| <sup>1</sup> H-NMR 18 Spectra.....            | S12 |
| <sup>13</sup> C-NMR 18 Spectra.....           | S13 |
| <sup>1</sup> H-NMR 19 Spectra.....            | S13 |
| <sup>13</sup> C-NMR 19 Spectra.....           | S14 |
| <sup>1</sup> H-NMR 20 Spectra.....            | S14 |
| <sup>13</sup> C-NMR 20 Spectra.....           | S15 |
| <sup>1</sup> H-NMR 28 Spectra.....            | S15 |
| <sup>13</sup> C-NMR 28 Spectra.....           | S16 |
| <sup>1</sup> H-NMR 11 Spectra.....            | S16 |
| <sup>13</sup> C-NMR 11 Spectra.....           | S17 |
| <sup>1</sup> H-NMR 12 Spectra.....            | S17 |
| <sup>13</sup> C-NMR 12 Spectra.....           | S18 |
| <sup>1</sup> H-NMR 21 Spectra.....            | S18 |
| <sup>13</sup> C-NMR 21 Spectra.....           | S19 |

|                                                                         |            |
|-------------------------------------------------------------------------|------------|
| <b><sup>1</sup>H-NMR 22 Spectra.....</b>                                | <b>S19</b> |
| <b><sup>13</sup>C-NMR 22 Spectra.....</b>                               | <b>S20</b> |
| <b><sup>1</sup>H-NMR 23 Spectra.....</b>                                | <b>S20</b> |
| <b><sup>13</sup>C-NMR 23 Spectra.....</b>                               | <b>S21</b> |
| <b><sup>1</sup>H-NMR 30 Spectra.....</b>                                | <b>S21</b> |
| <b><sup>13</sup>C-NMR 30 Spectra.....</b>                               | <b>S22</b> |
| <b><sup>1</sup>H-NMR 31 Spectra.....</b>                                | <b>S22</b> |
| <b><sup>13</sup>C-NMR 31 Spectra.....</b>                               | <b>S23</b> |
| <b><sup>1</sup>H-NMR 2 Spectra.....</b>                                 | <b>S23</b> |
| <b><sup>13</sup>C-NMR 2 Spectra.....</b>                                | <b>S24</b> |
| <b><sup>1</sup>H-NMR 3 Spectra.....</b>                                 | <b>S24</b> |
| <b><sup>13</sup>C-NMR 3 Spectra.....</b>                                | <b>S25</b> |
| <b><sup>1</sup>H-NMR 4 Spectra.....</b>                                 | <b>S25</b> |
| <b><sup>13</sup>C-NMR 4 Spectra.....</b>                                | <b>S26</b> |
| <b><sup>1</sup>H-NMR 5 Spectra.....</b>                                 | <b>S26</b> |
| <b><sup>13</sup>C-NMR 5 Spectra.....</b>                                | <b>S27</b> |
| <b><sup>1</sup>H-NMR 6 Spectra.....</b>                                 | <b>S27</b> |
| <b><sup>13</sup>C-NMR 6 Spectra.....</b>                                | <b>S28</b> |
| <b><sup>1</sup>H-NMR 7 Spectra.....</b>                                 | <b>S28</b> |
| <b><sup>13</sup>C-NMR 7 Spectra.....</b>                                | <b>S29</b> |
| <b><sup>1</sup>H-NMR 8 Spectra.....</b>                                 | <b>S29</b> |
| <b><sup>13</sup>C-NMR 8 Spectra.....</b>                                | <b>S30</b> |
| <b>HPLC Analysis of 20 .....</b>                                        | <b>S30</b> |
| <b><i>E</i> and <i>Z</i> isomers of 20: HPLC-MS and UV spectra.....</b> | <b>S31</b> |
| <b><i>E</i> and <i>Z</i> isomers of 20: MS spectra .....</b>            | <b>S32</b> |

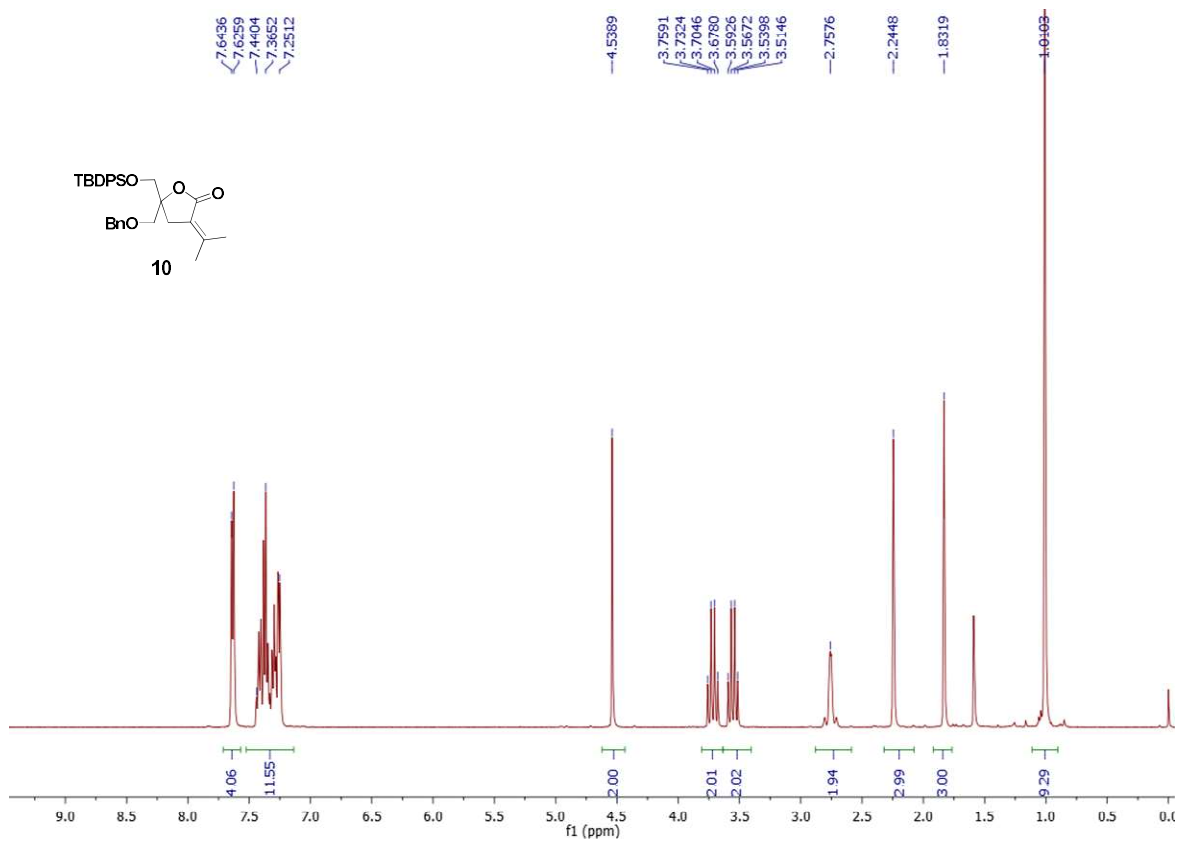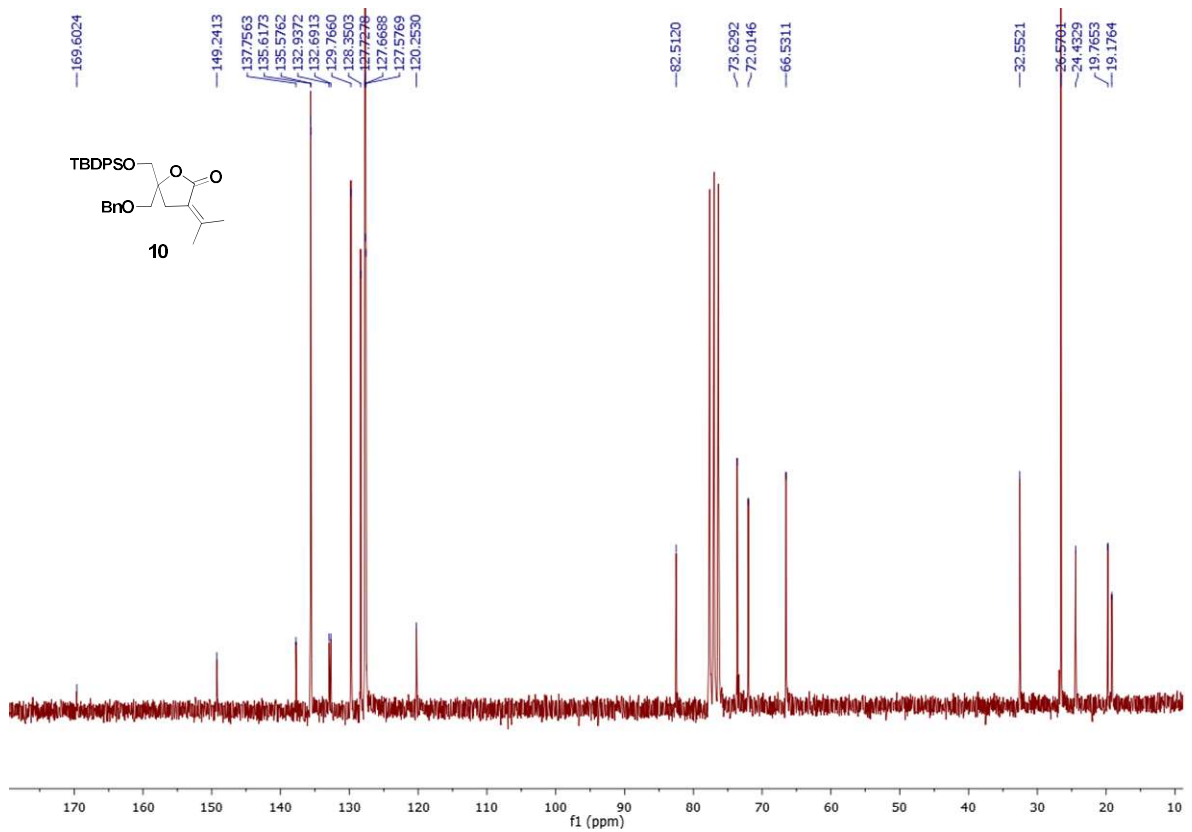

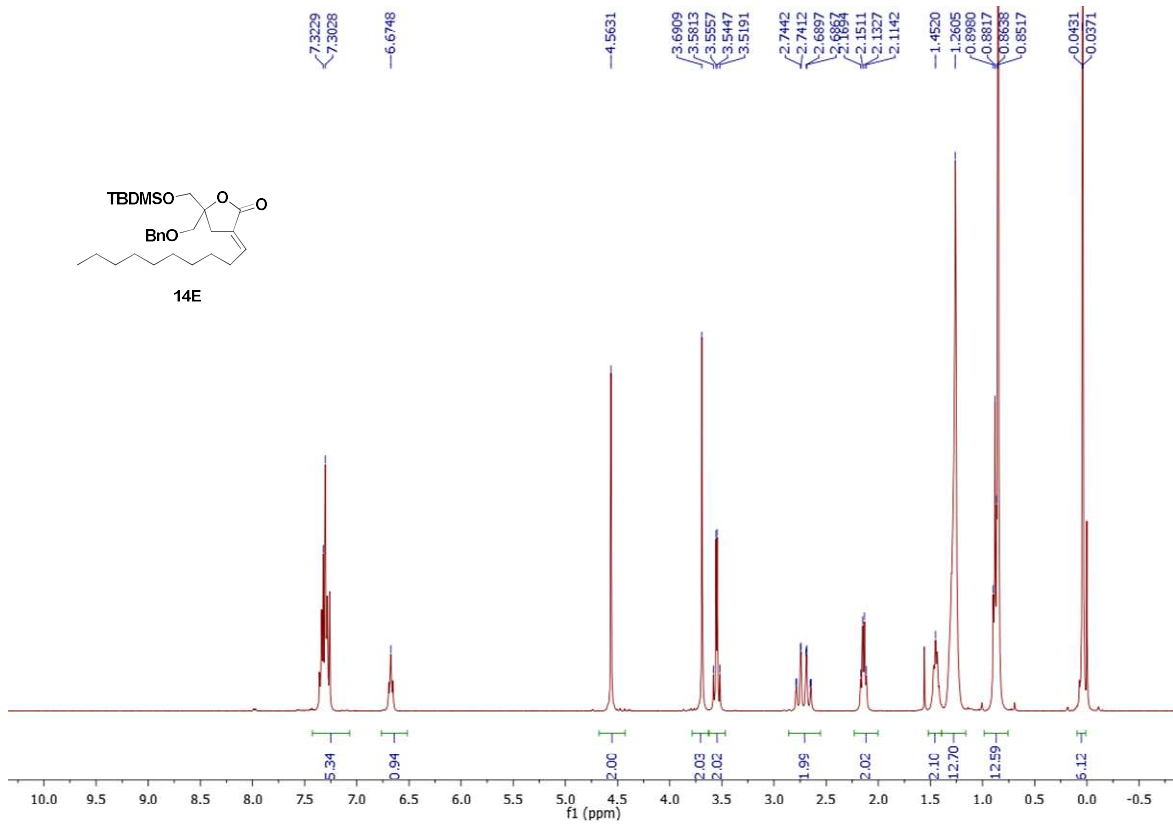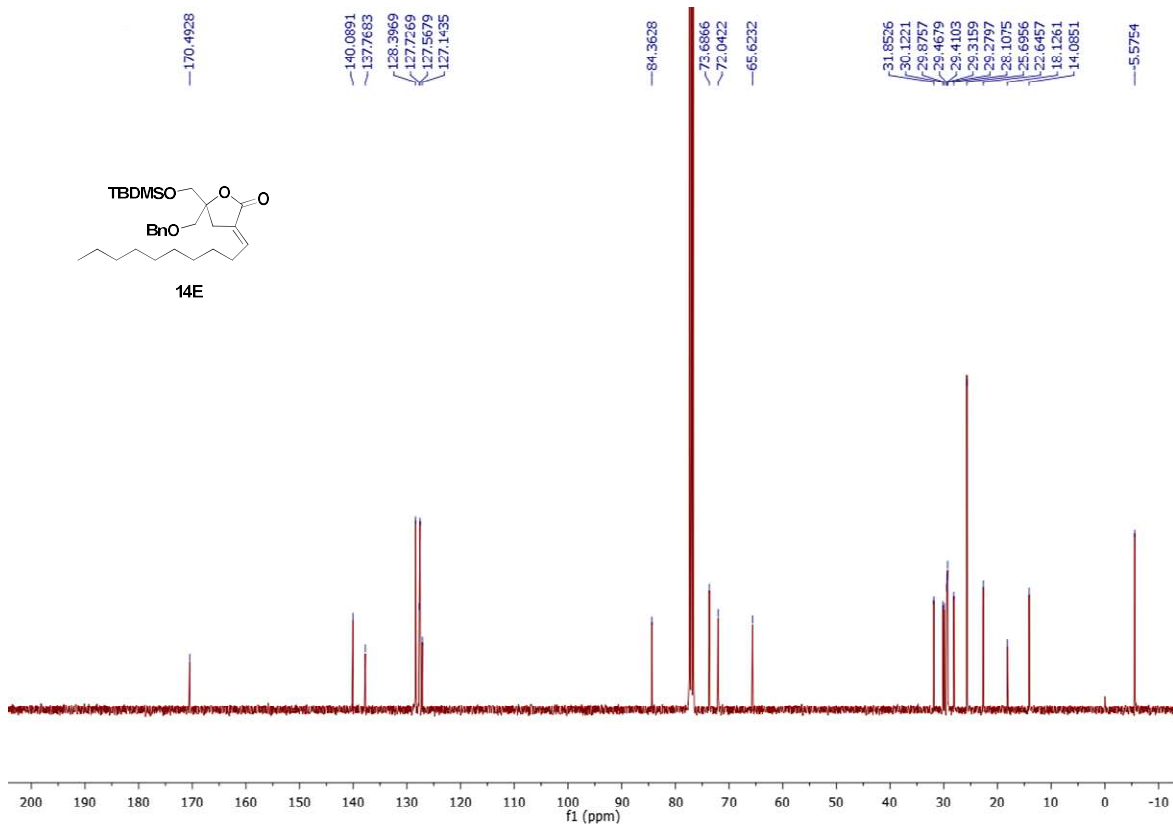

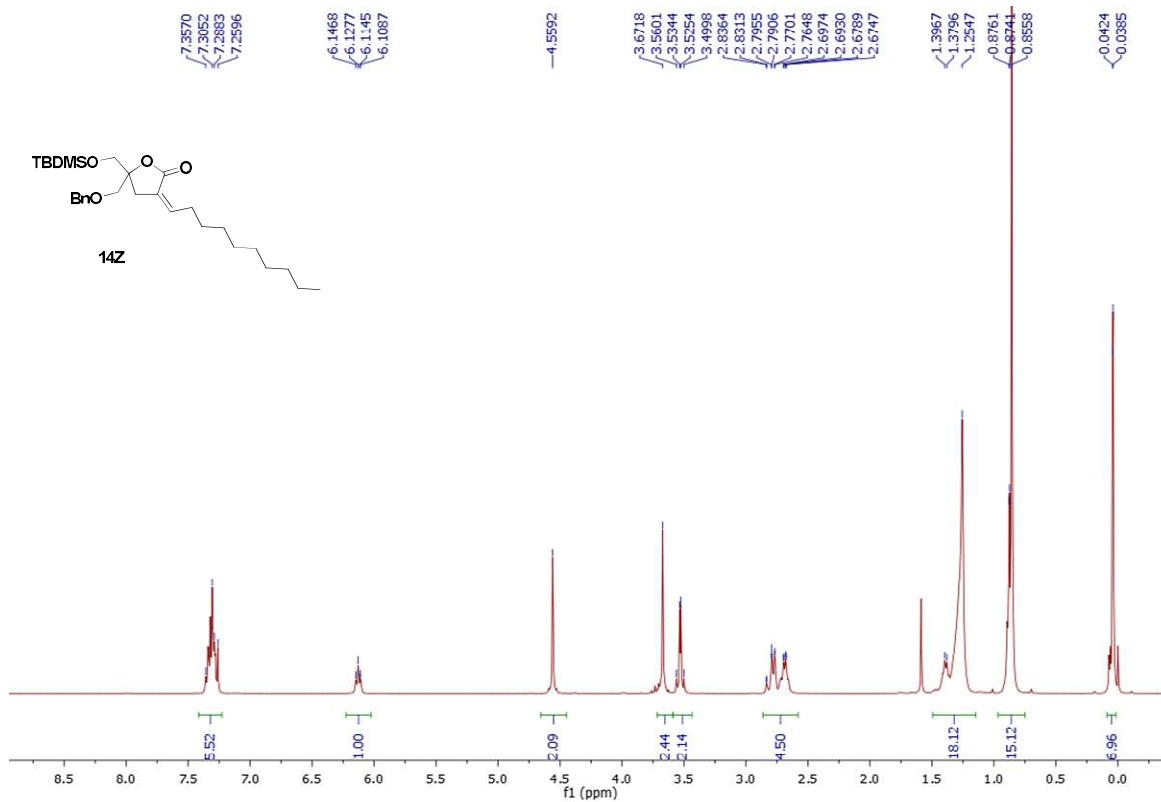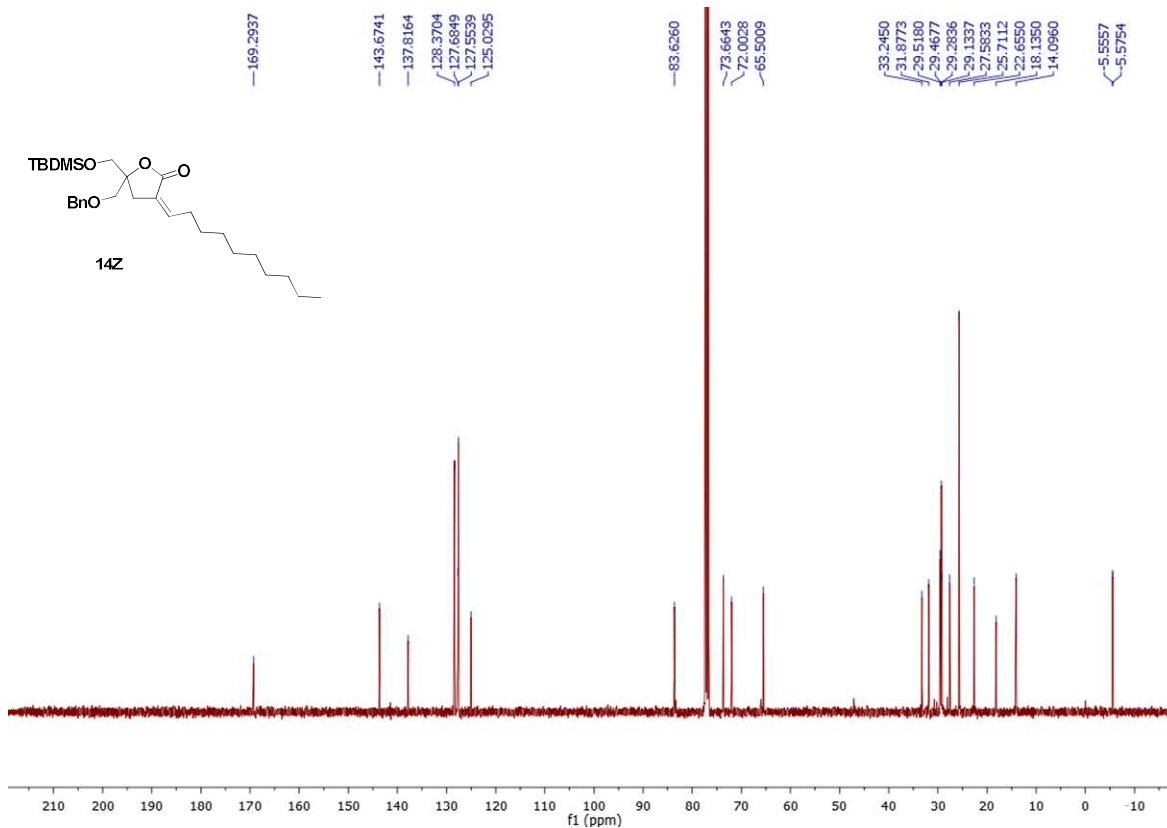

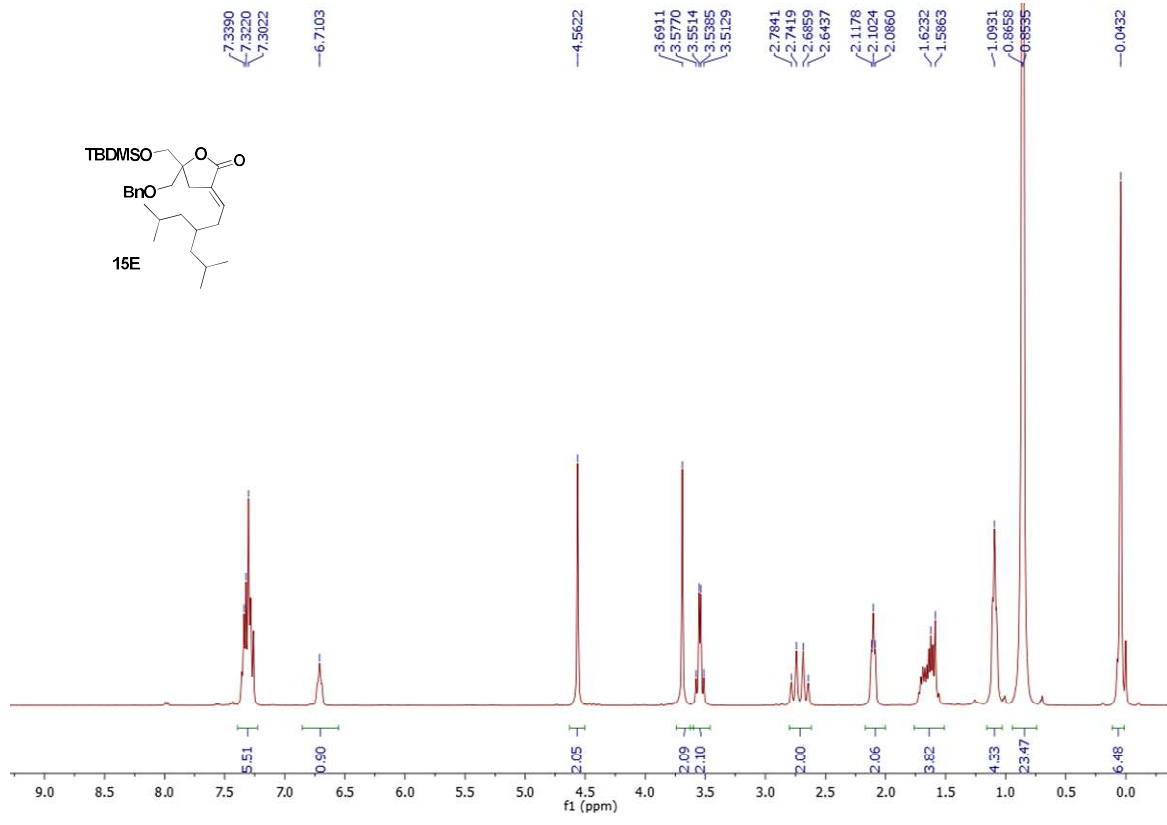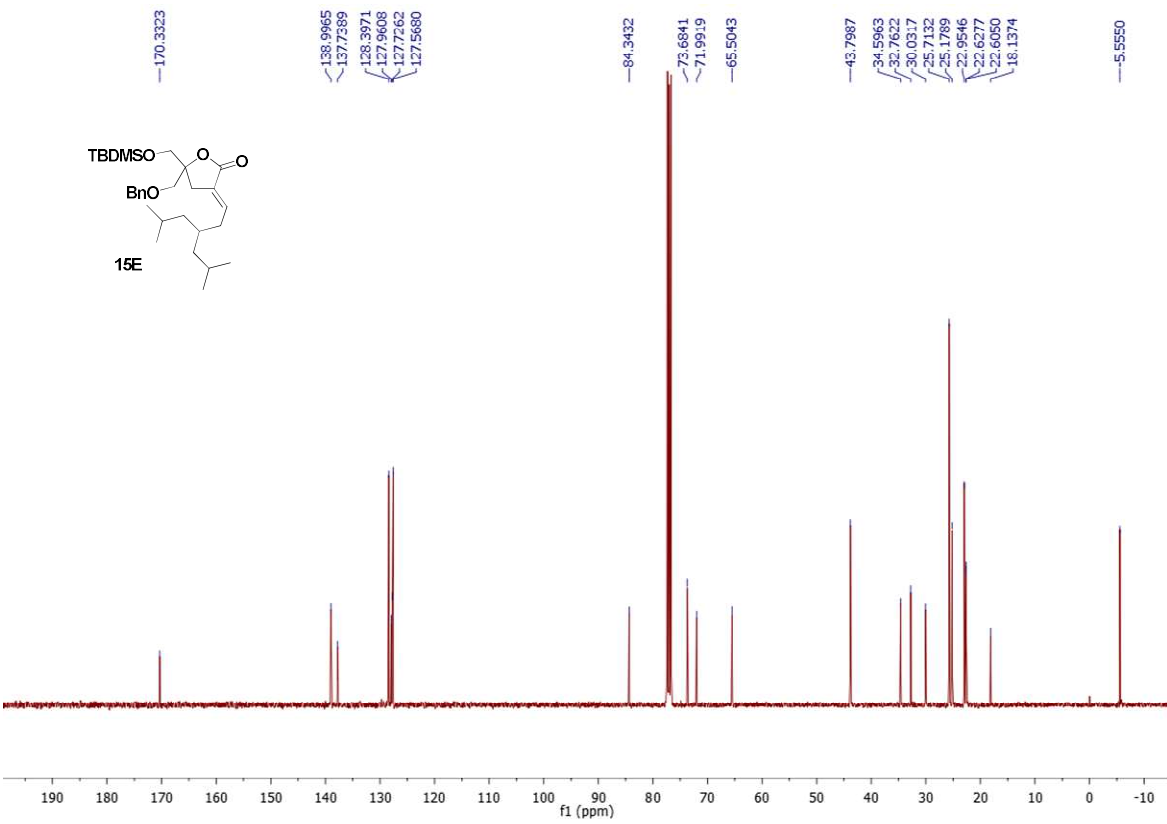

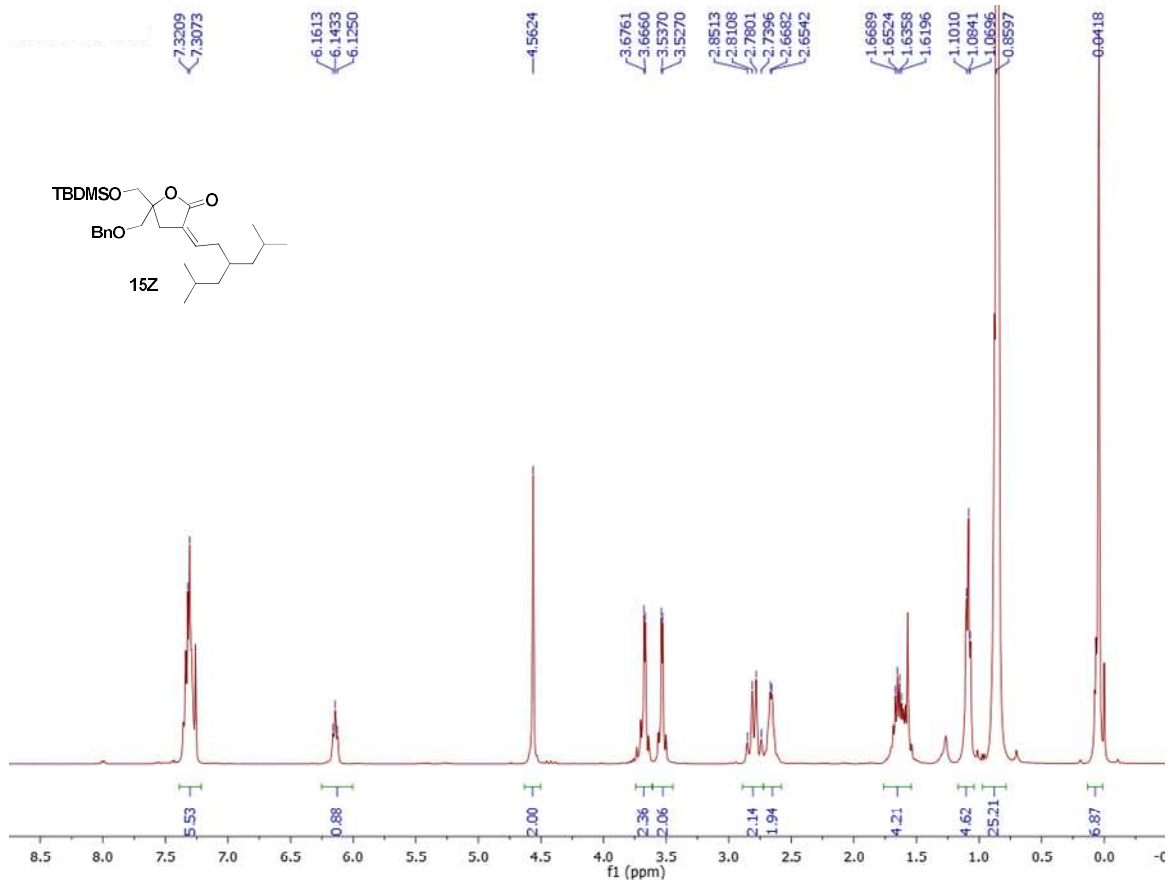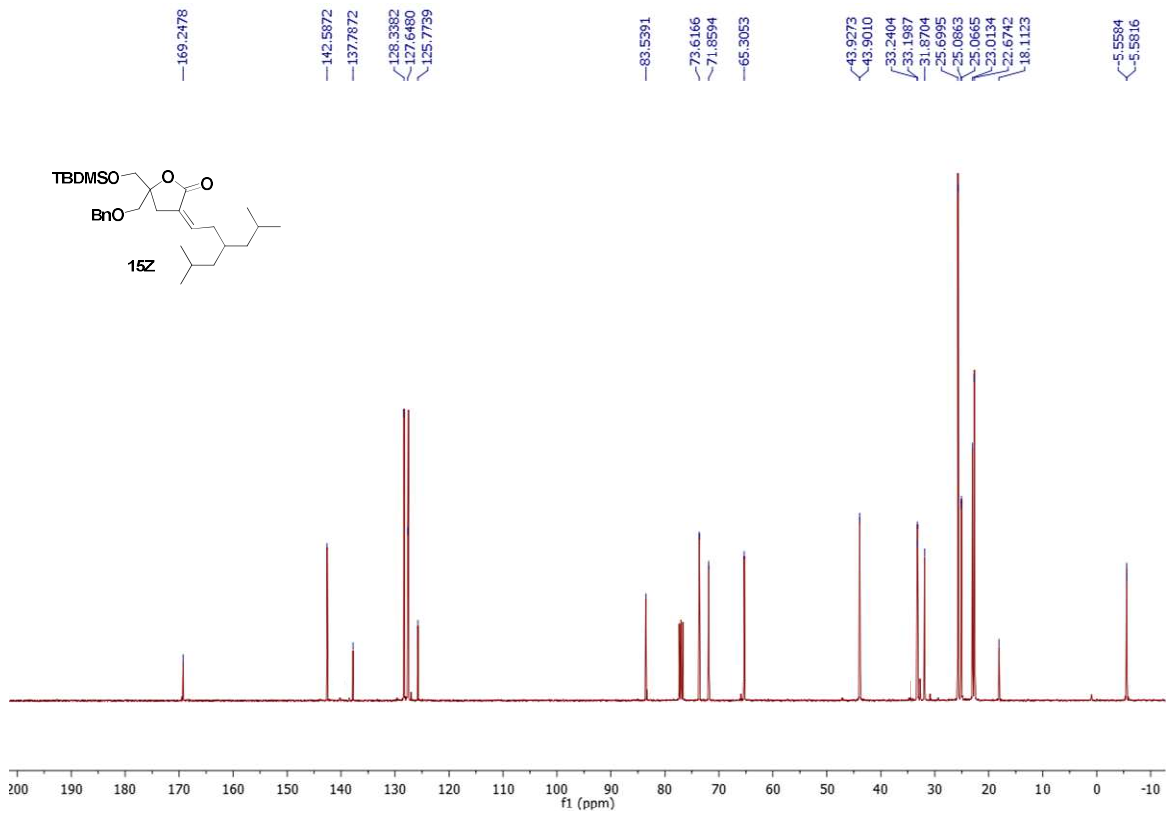





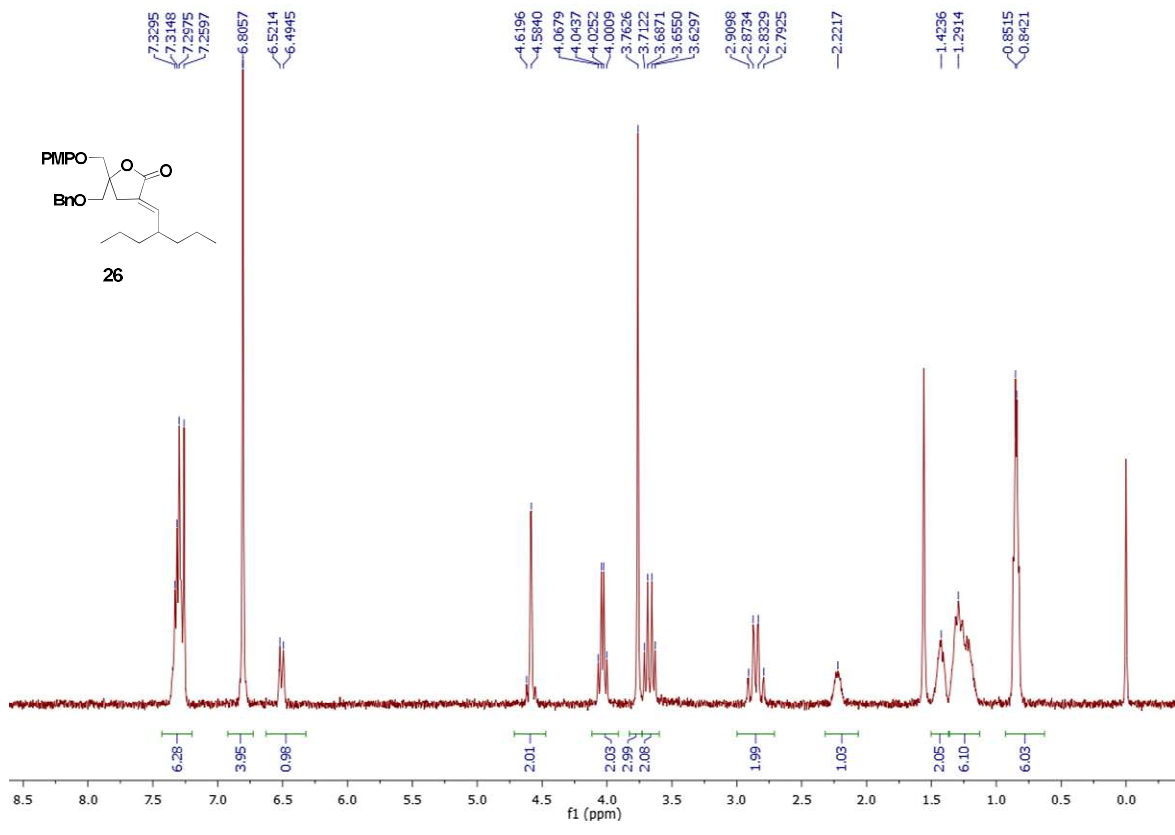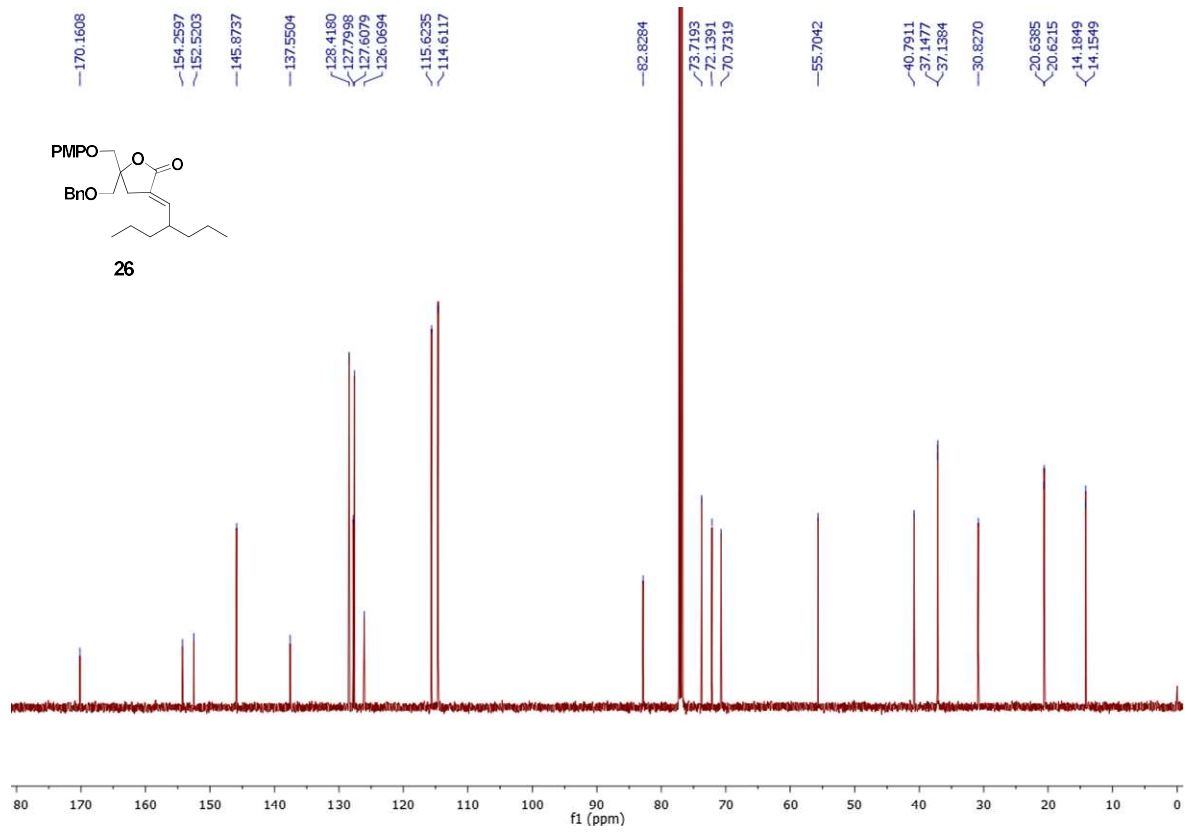

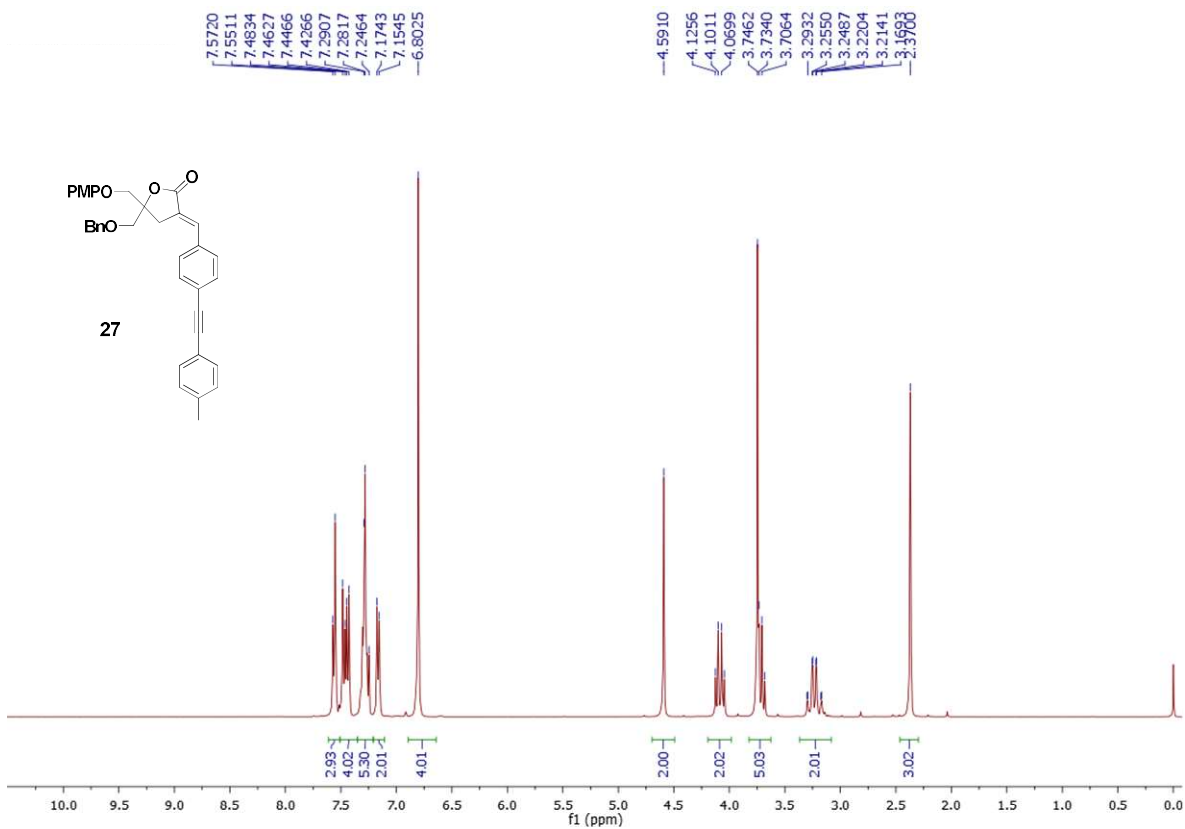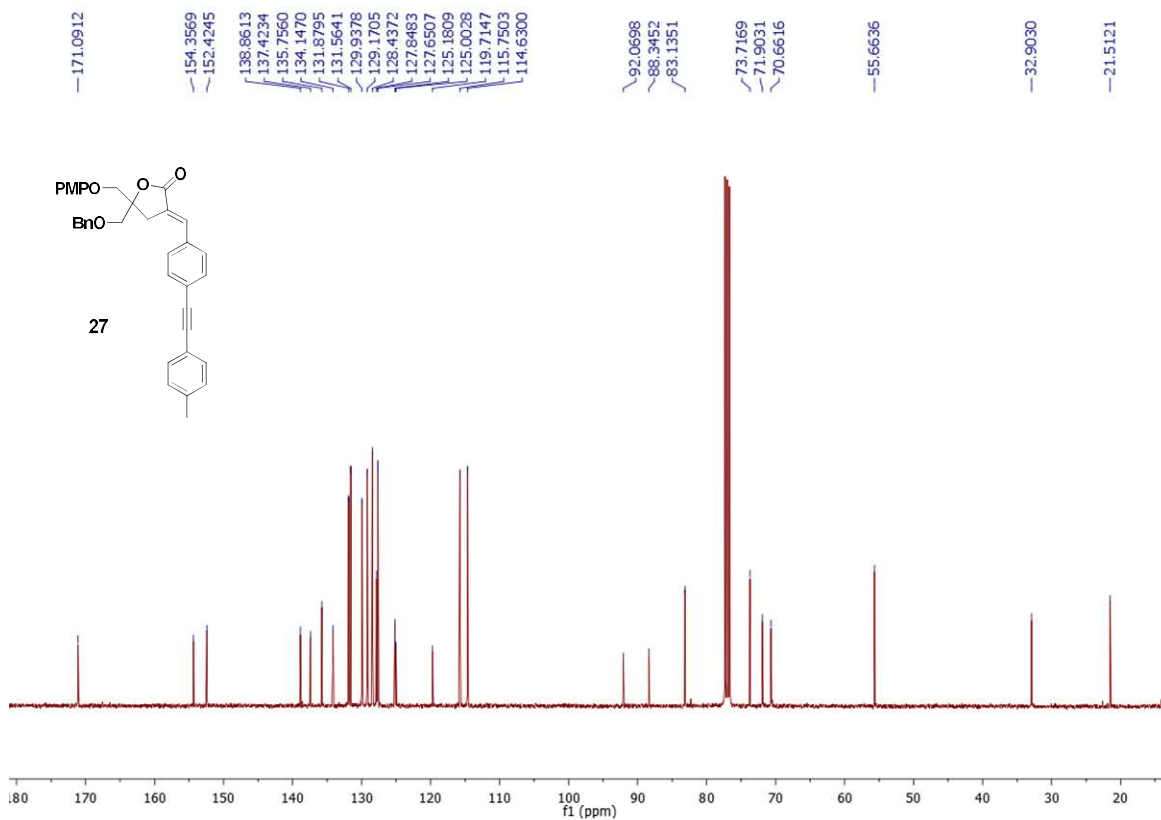



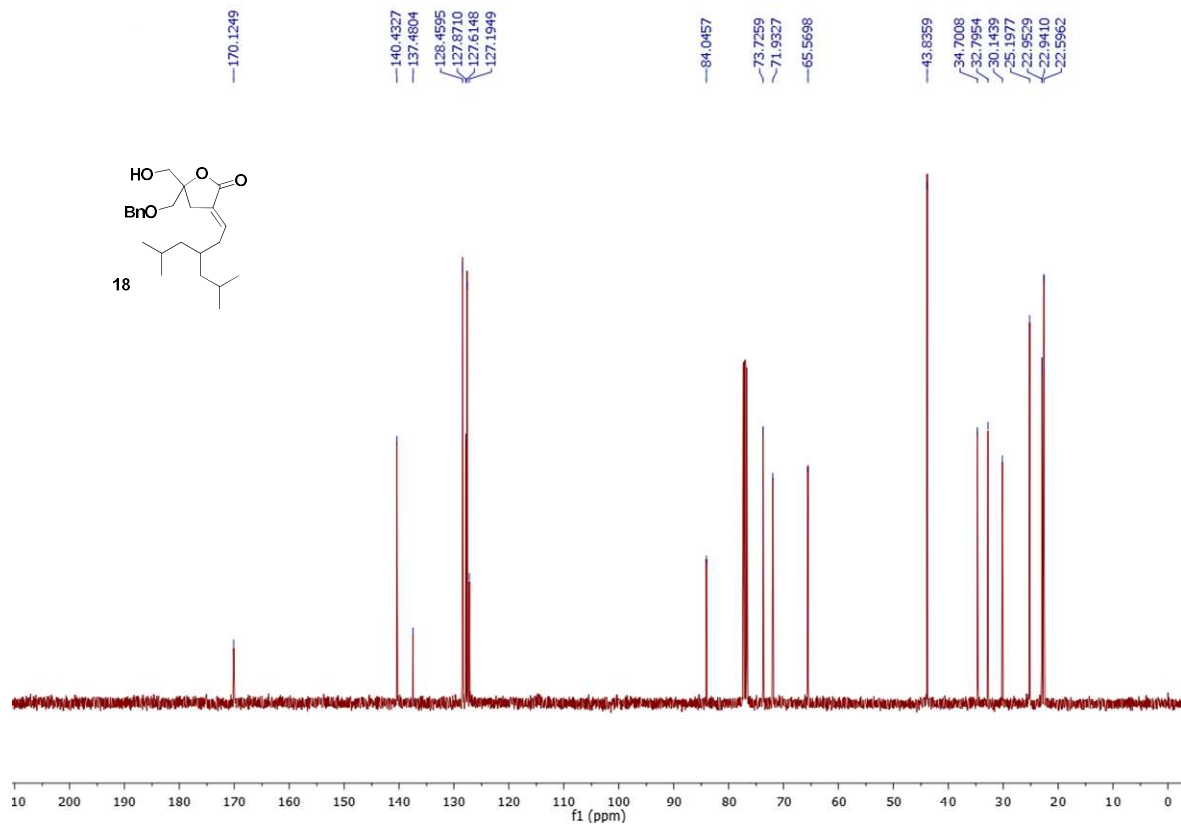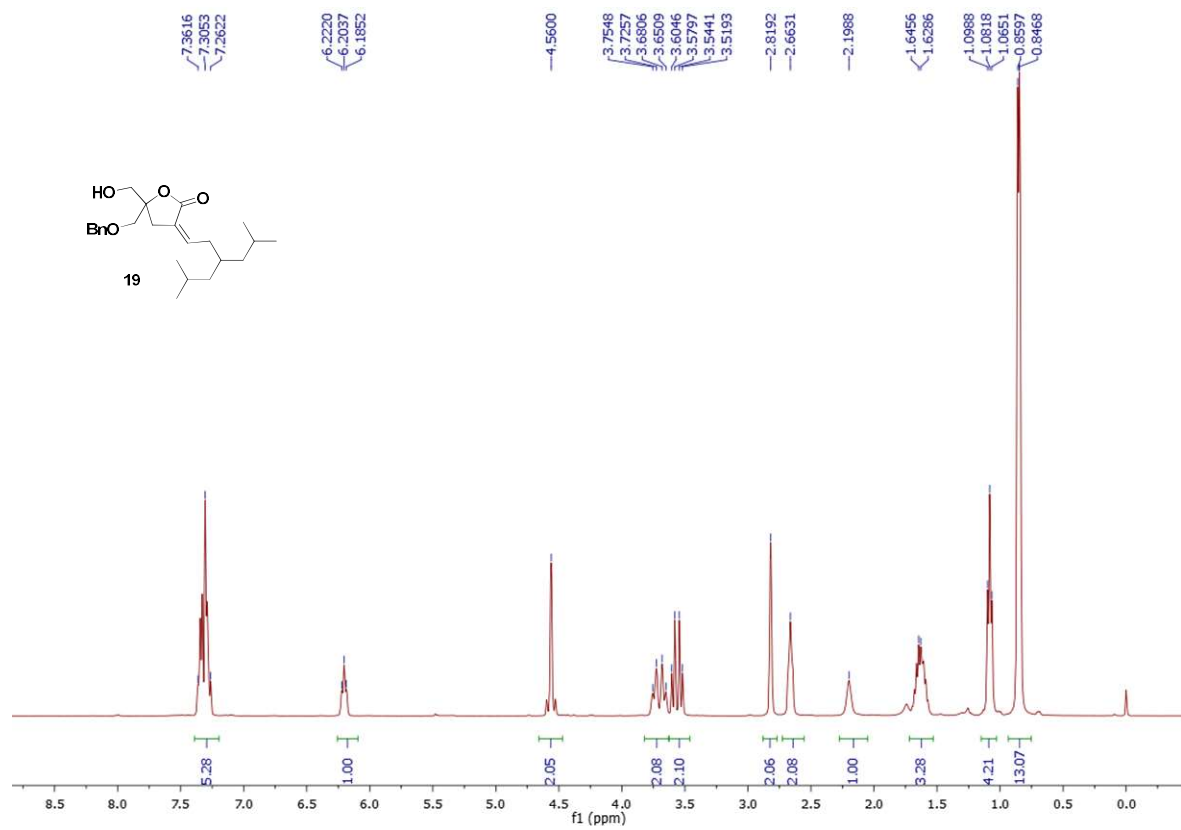

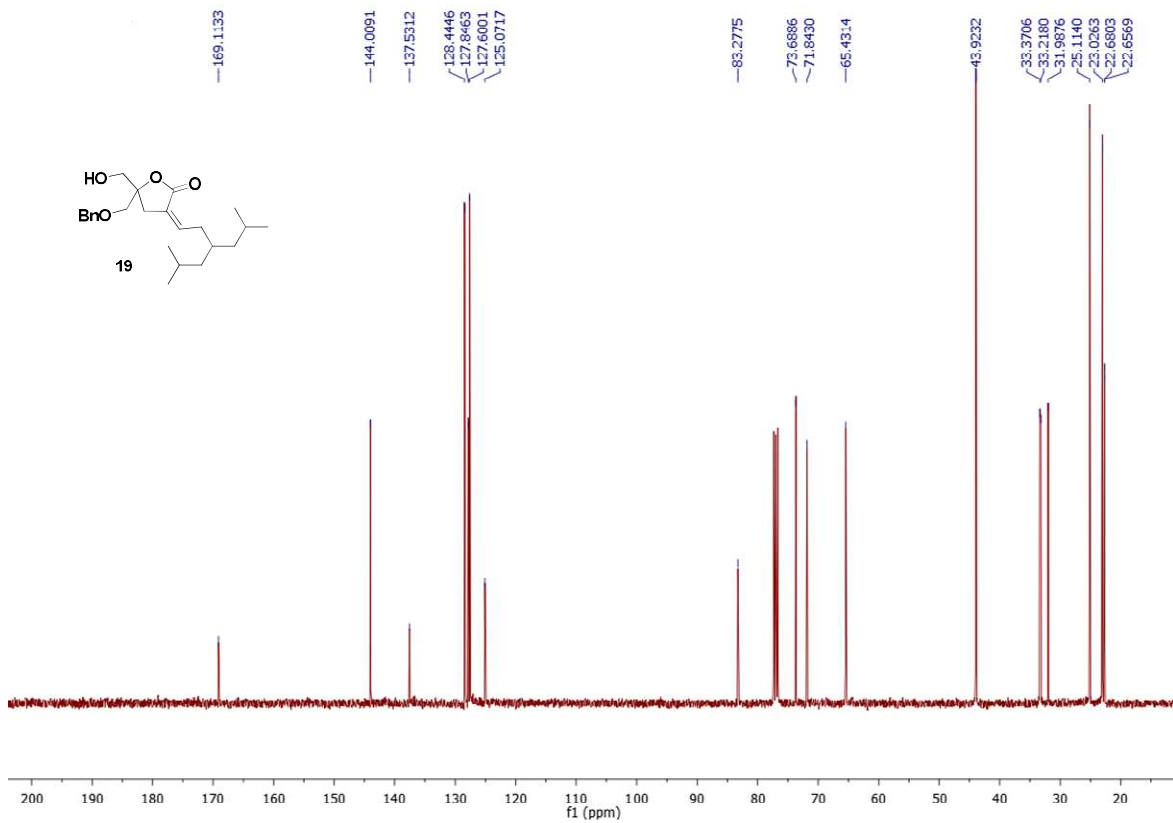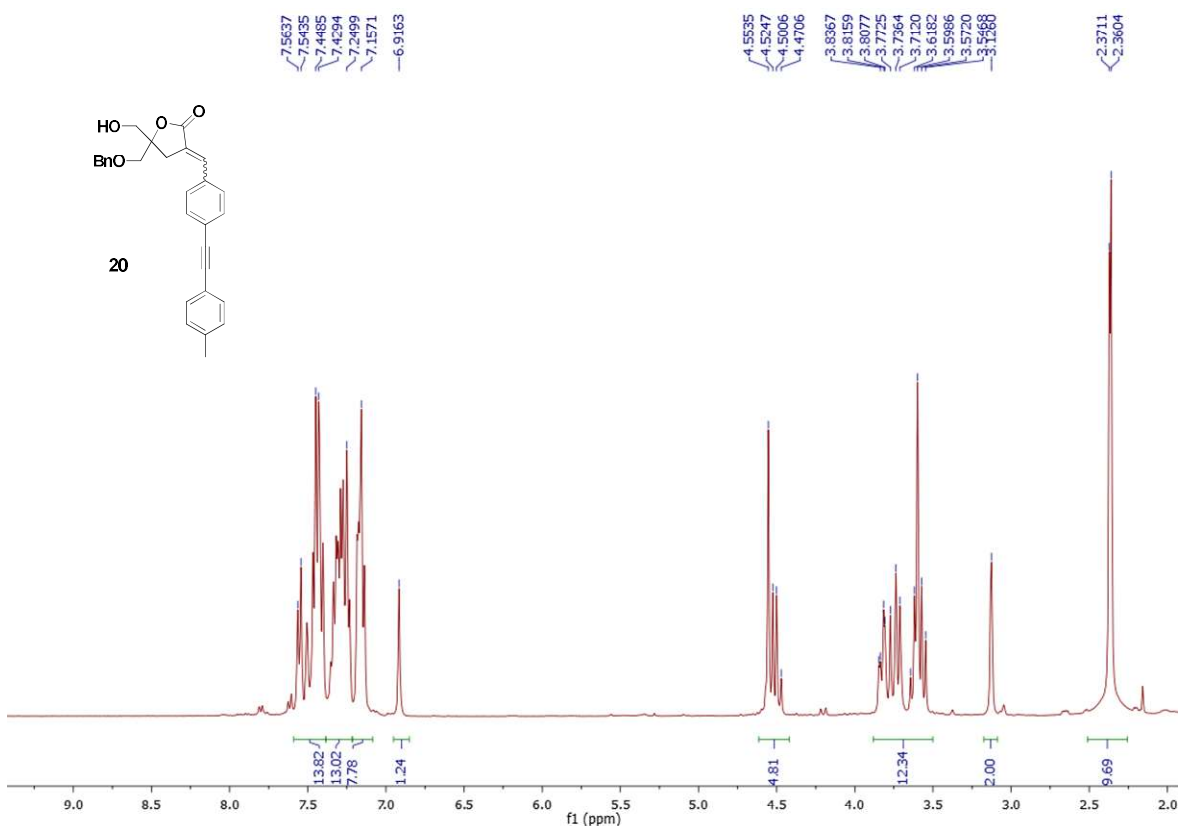

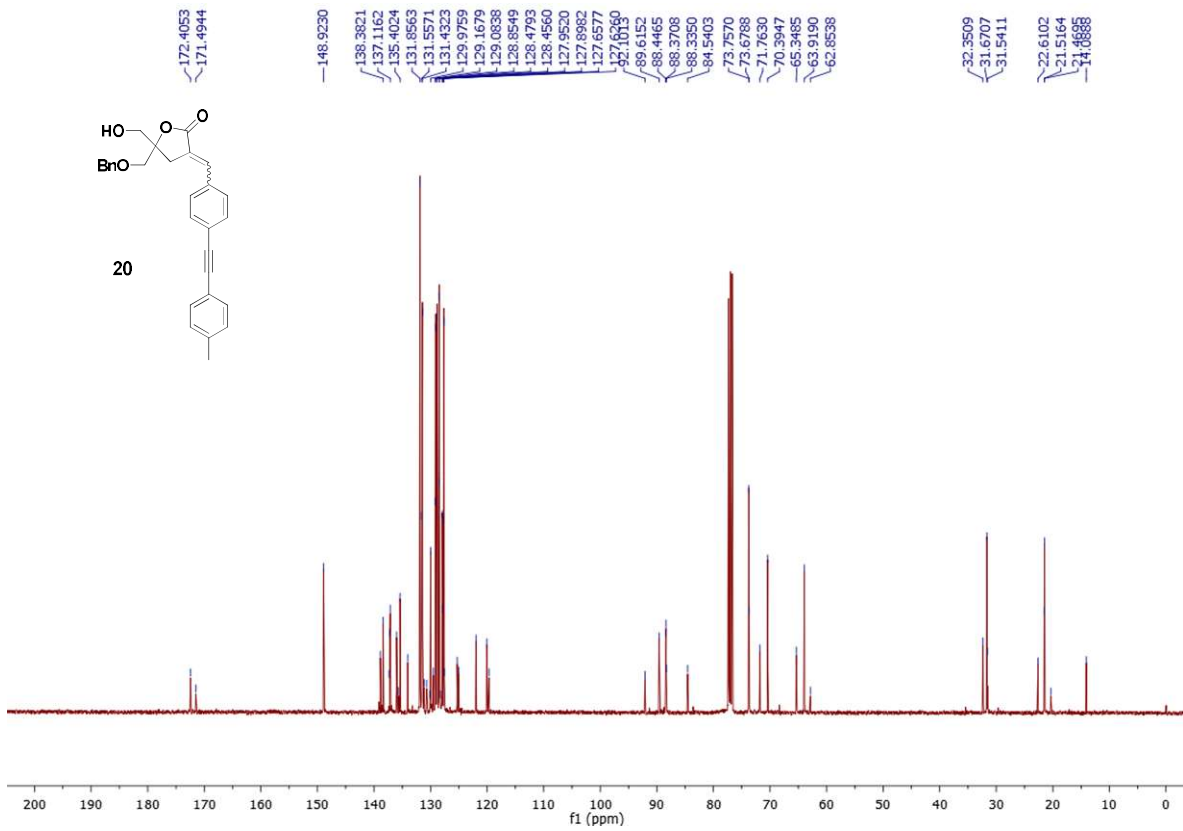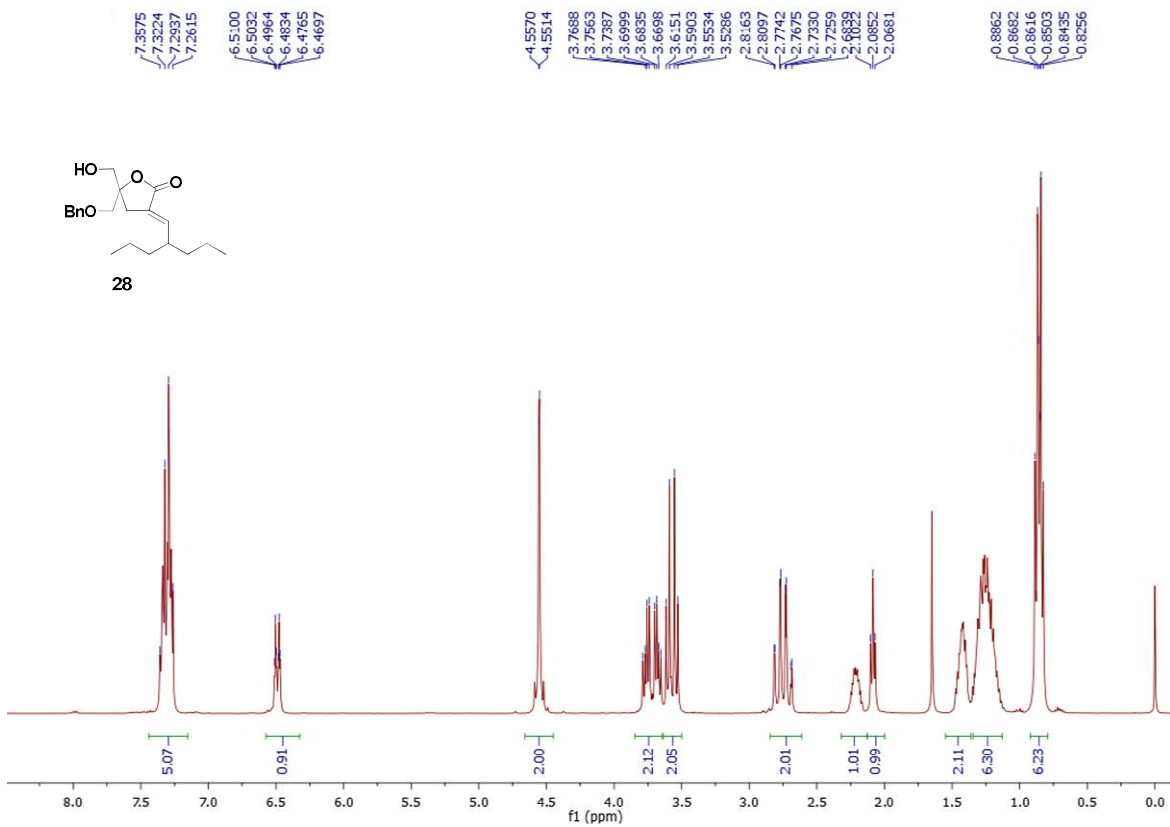

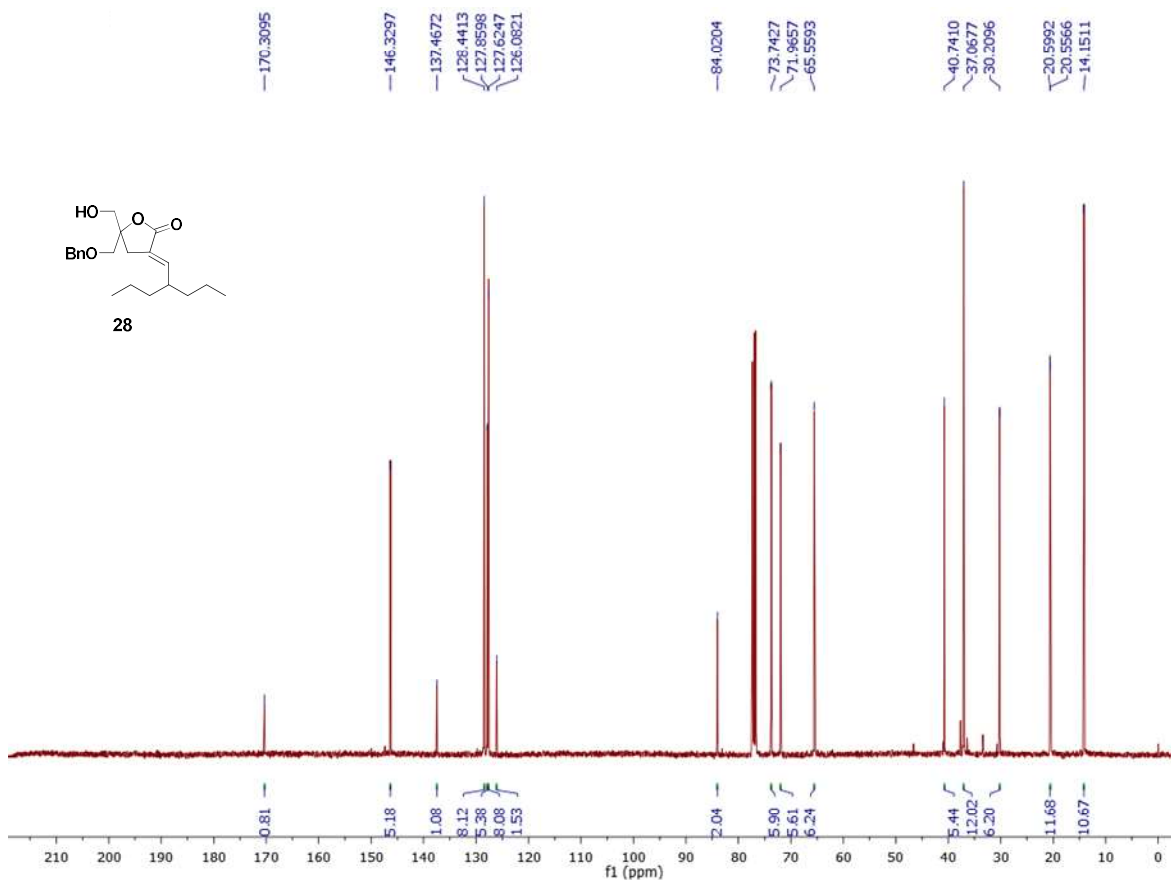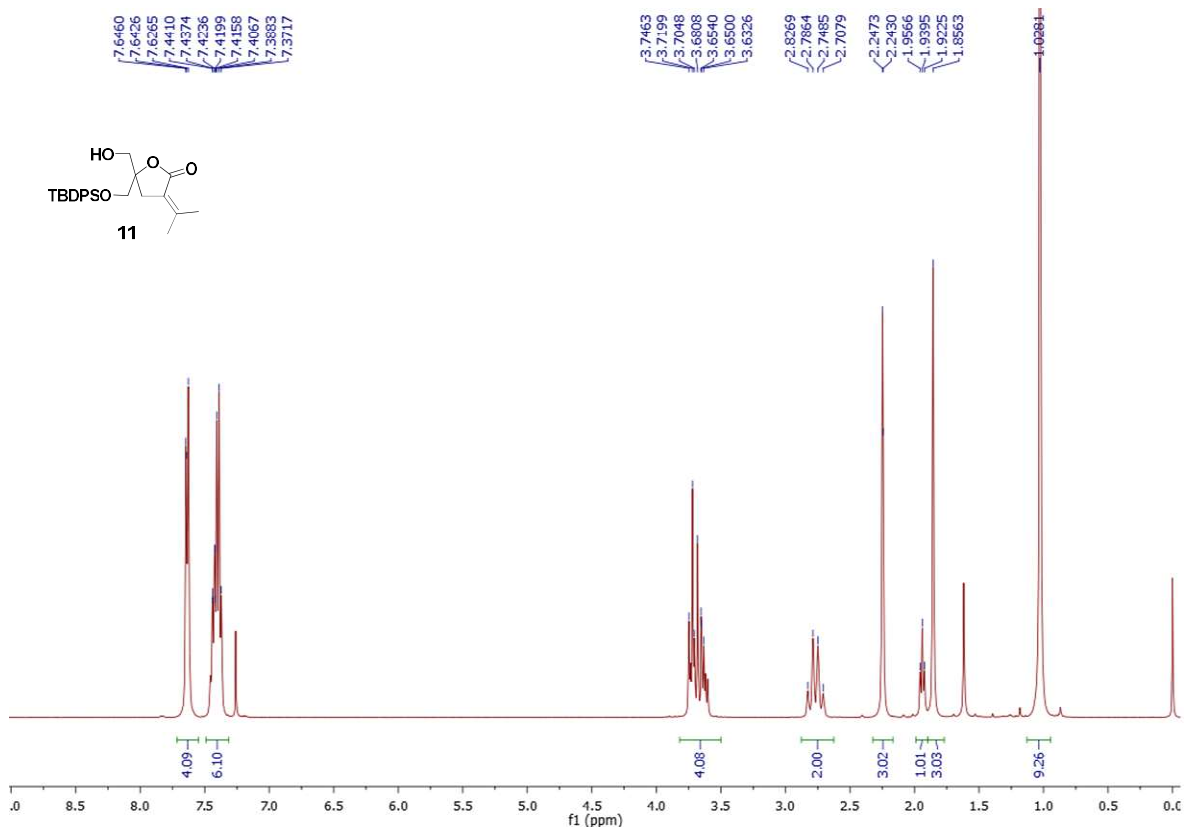



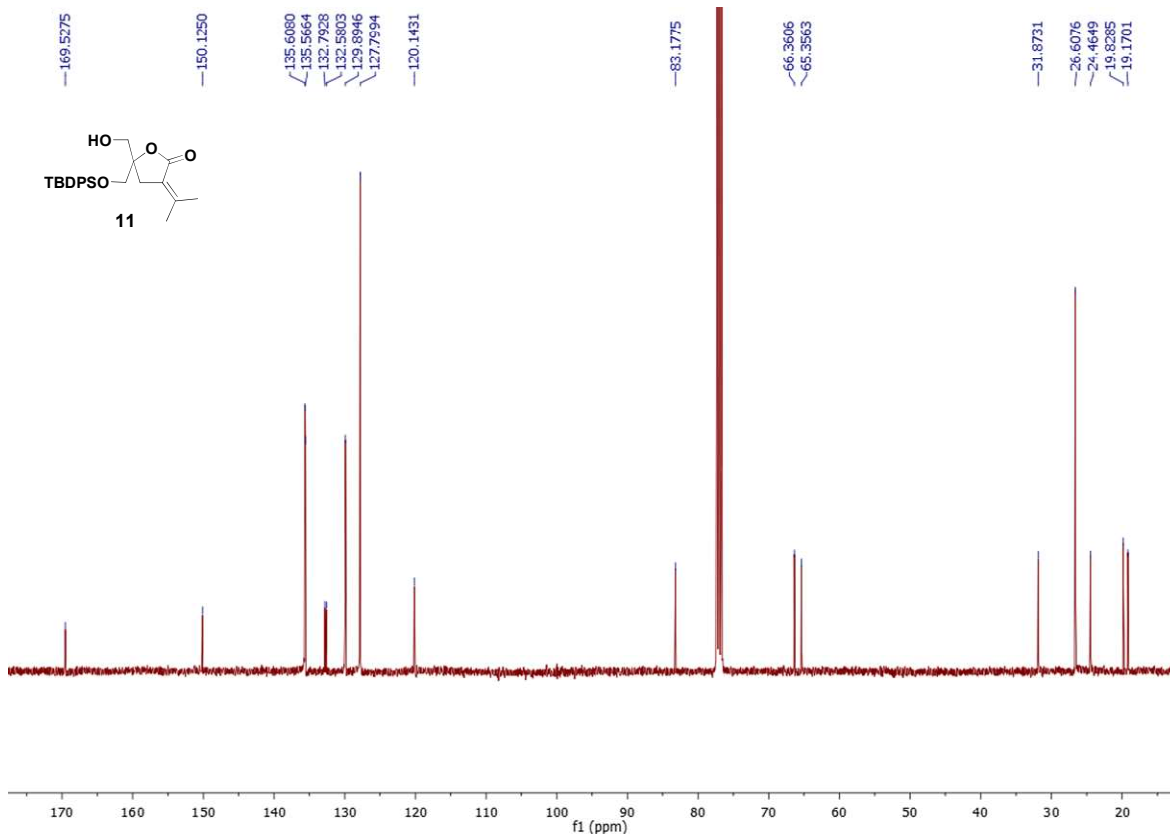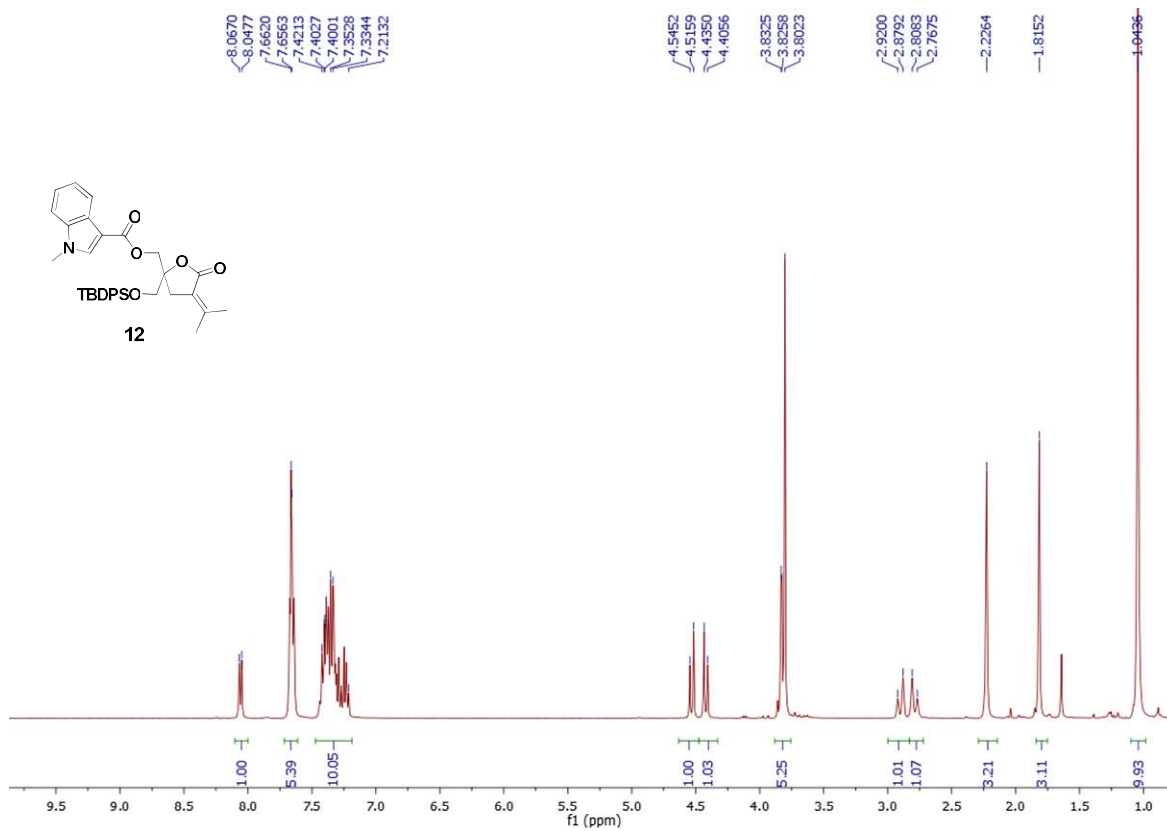

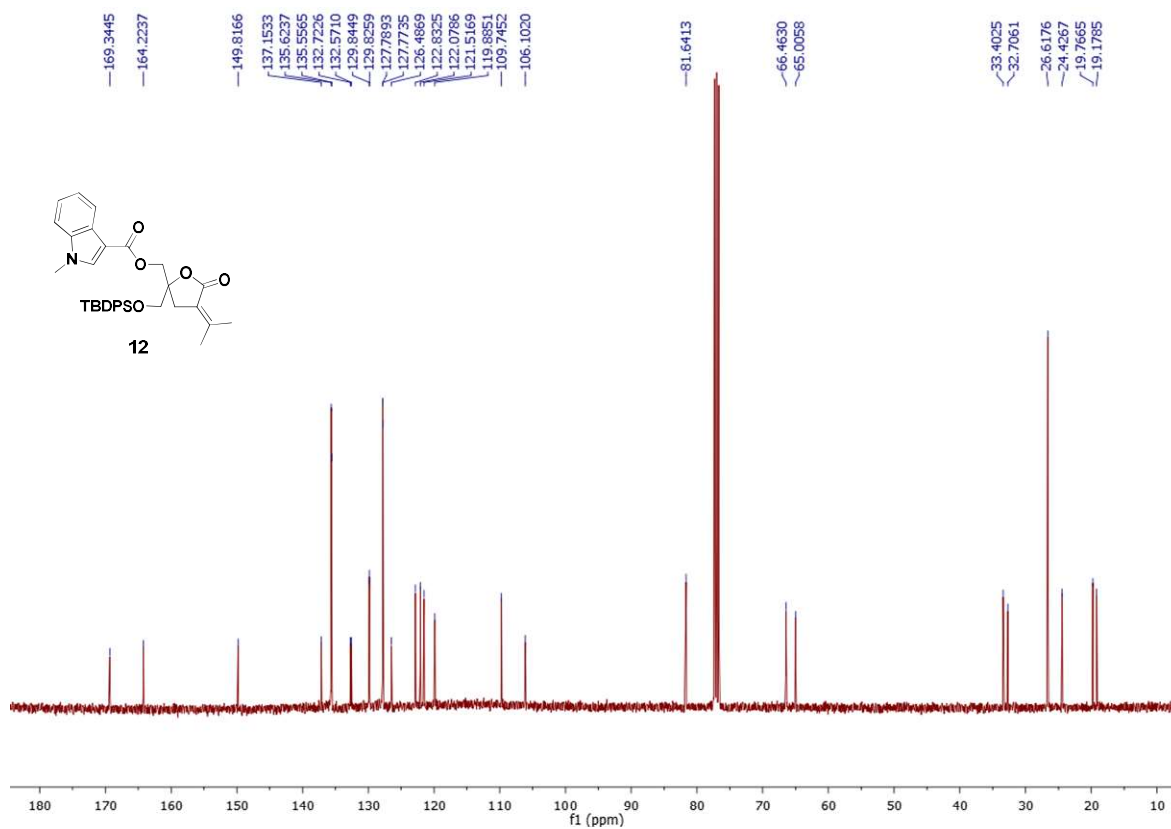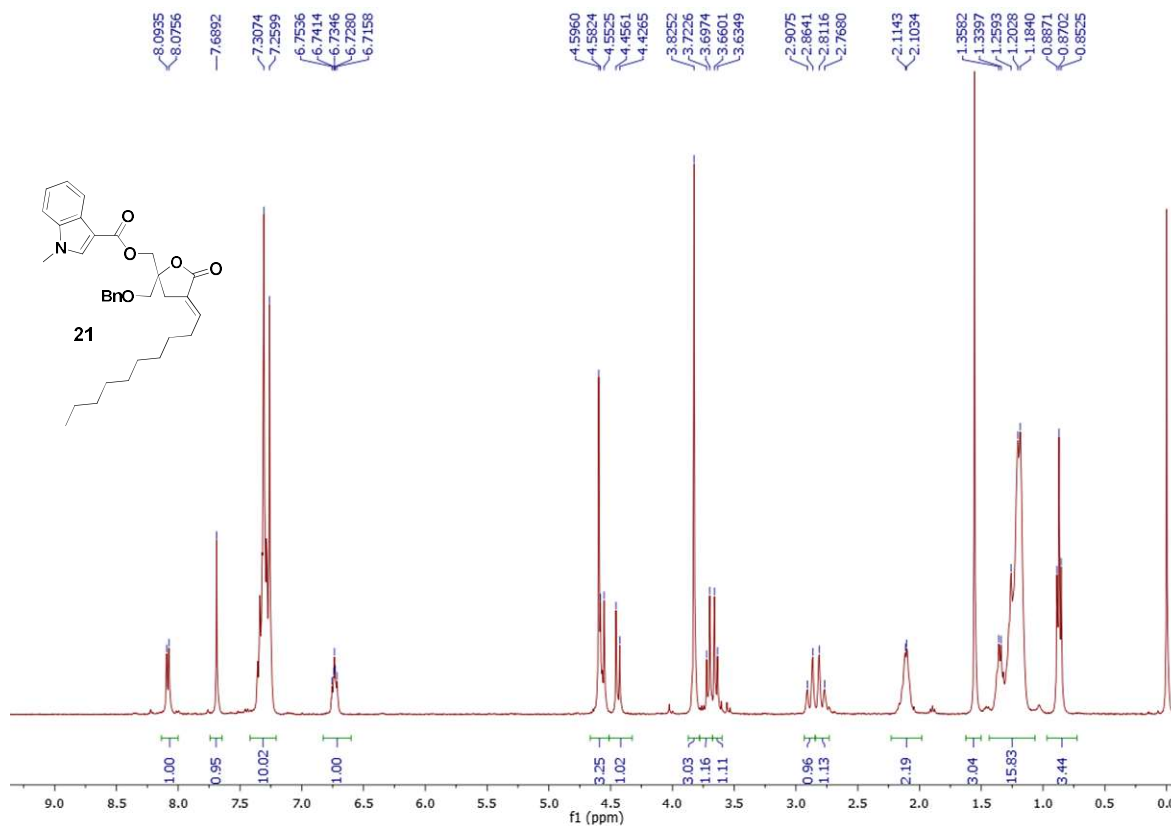

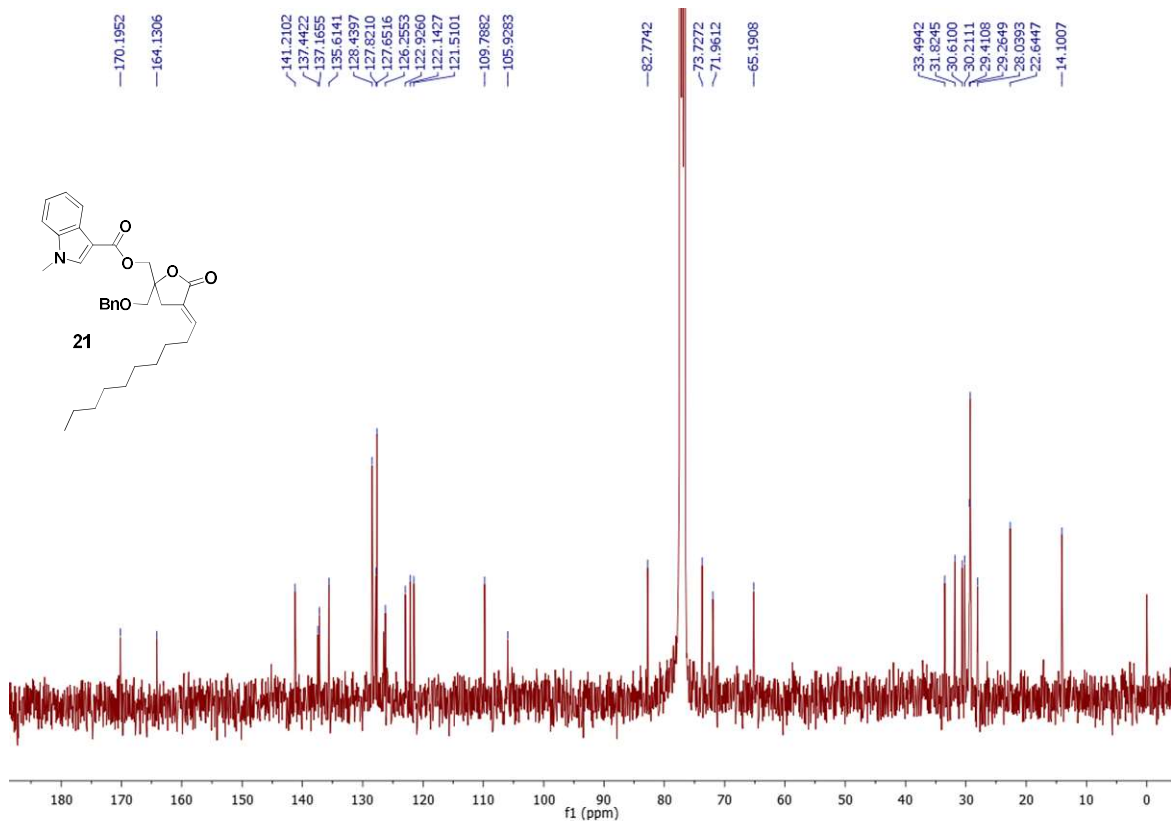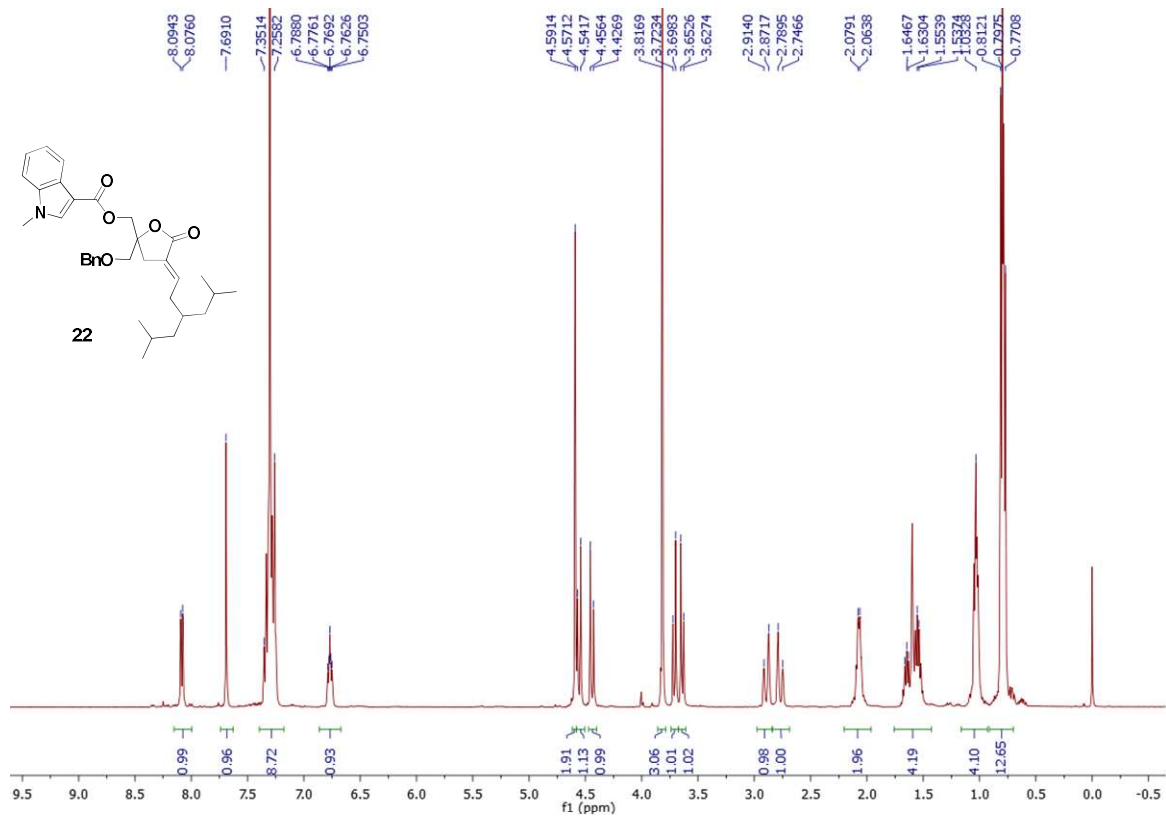

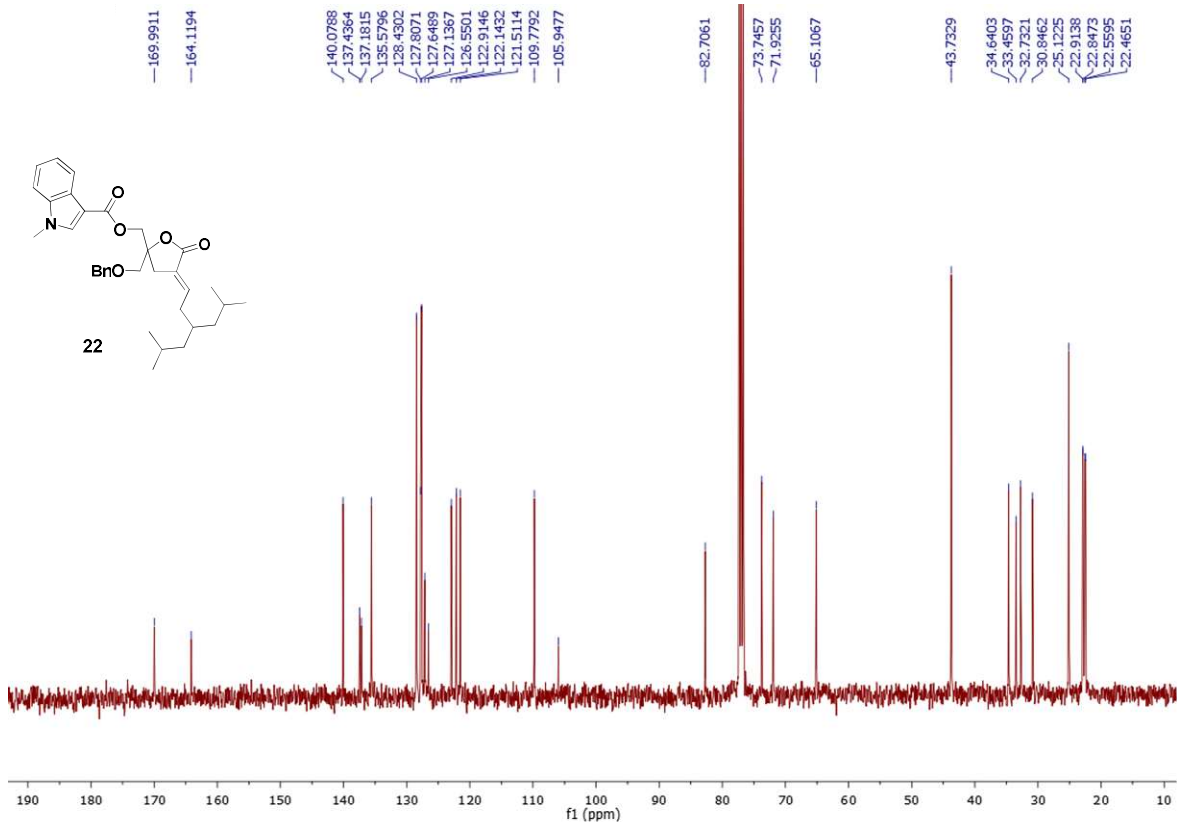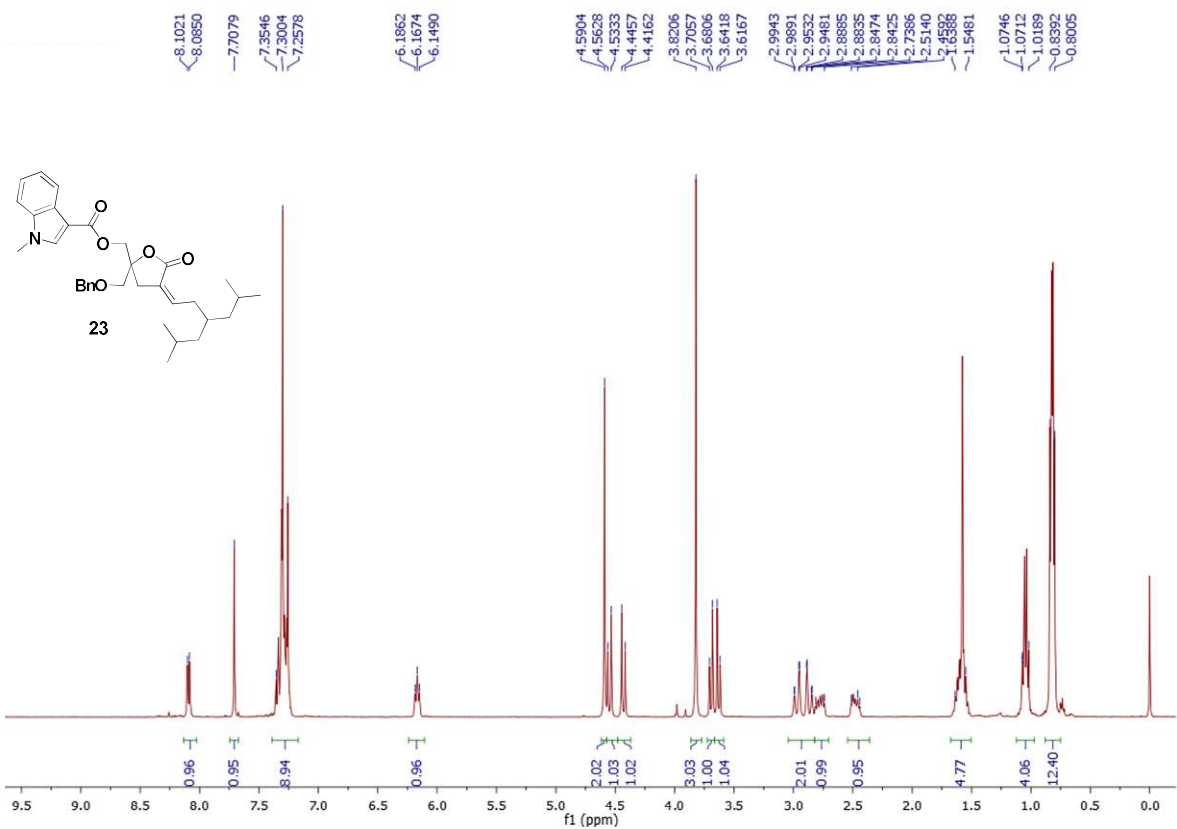

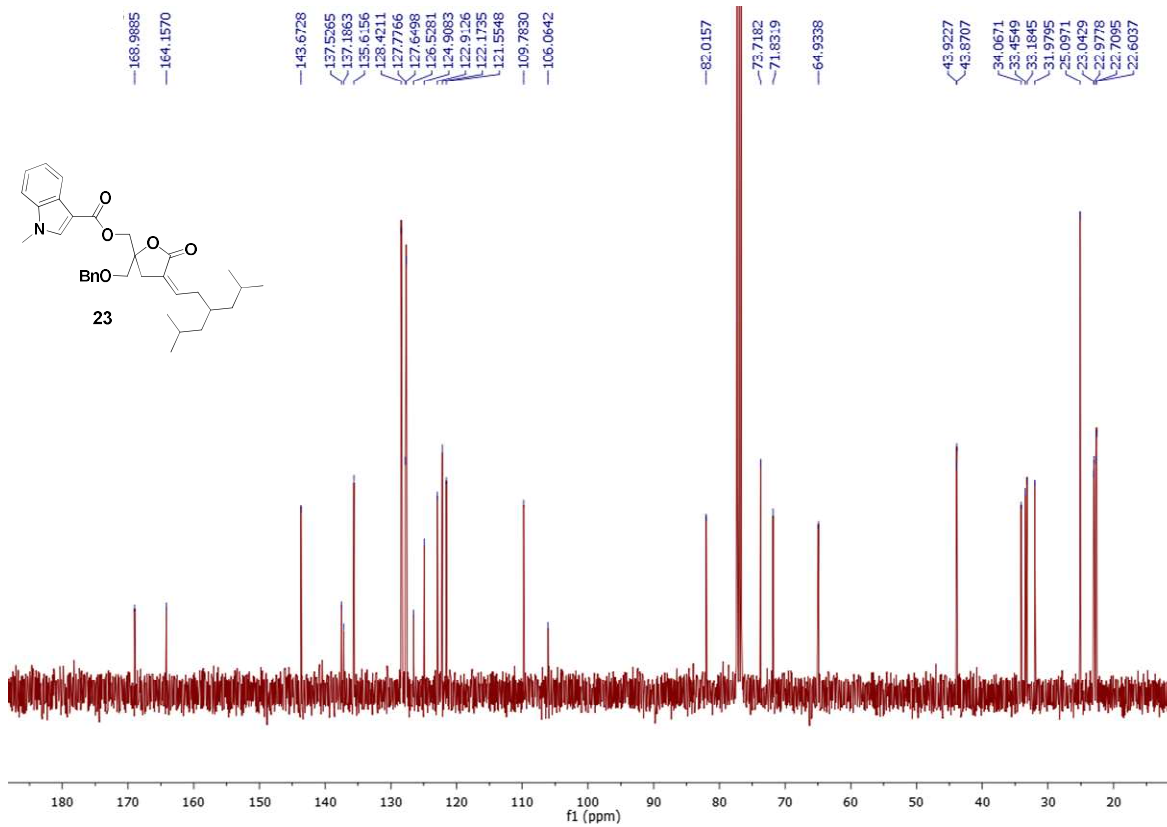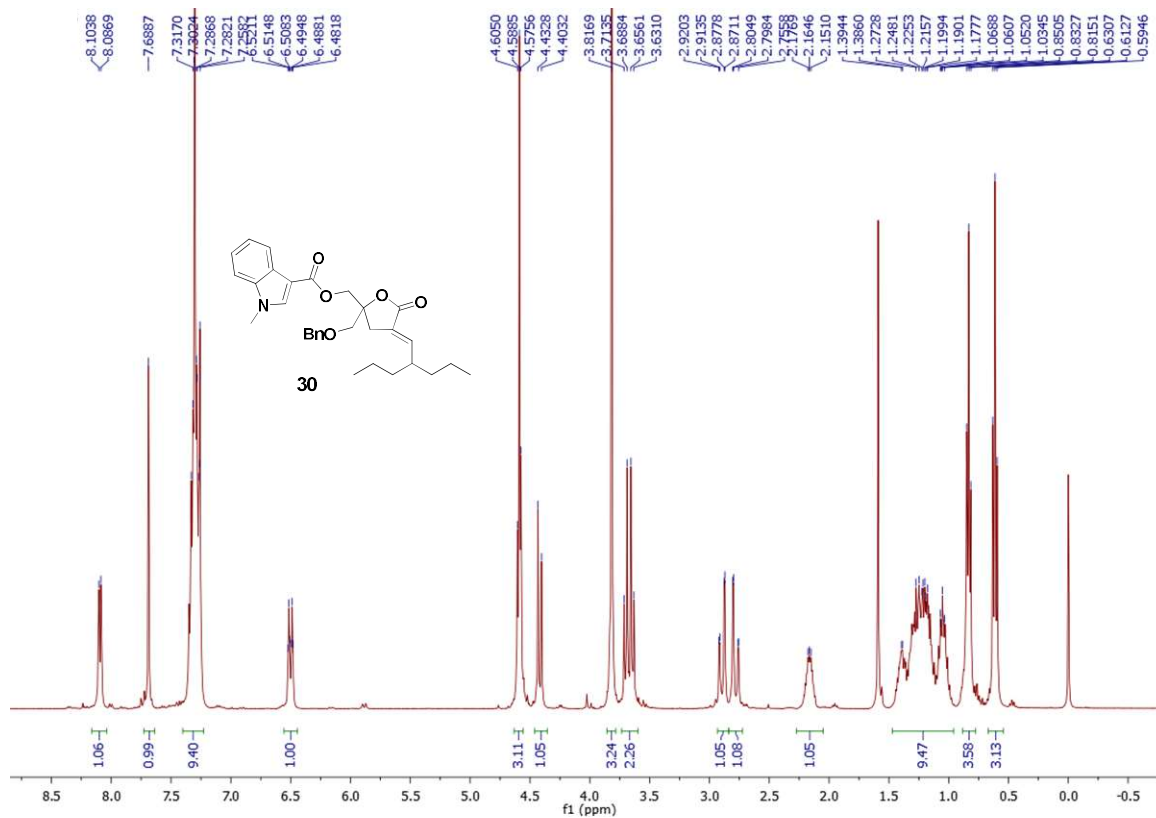

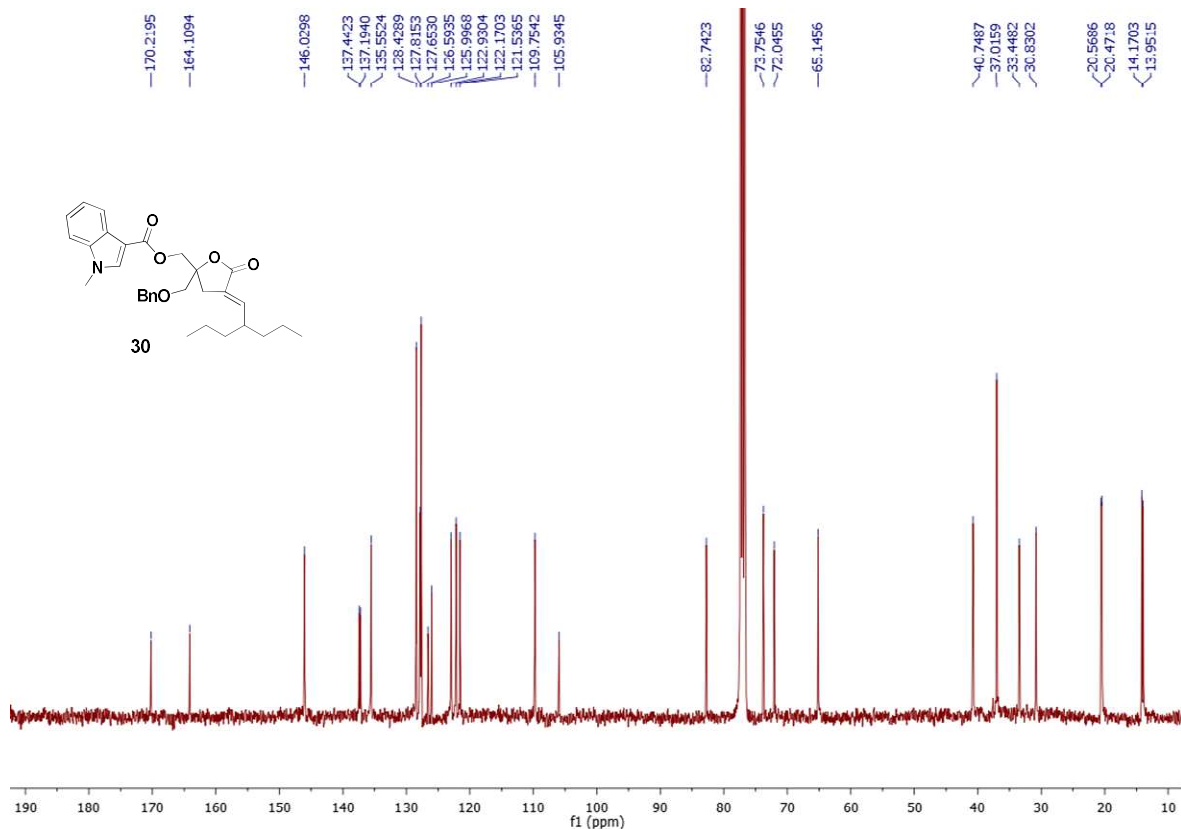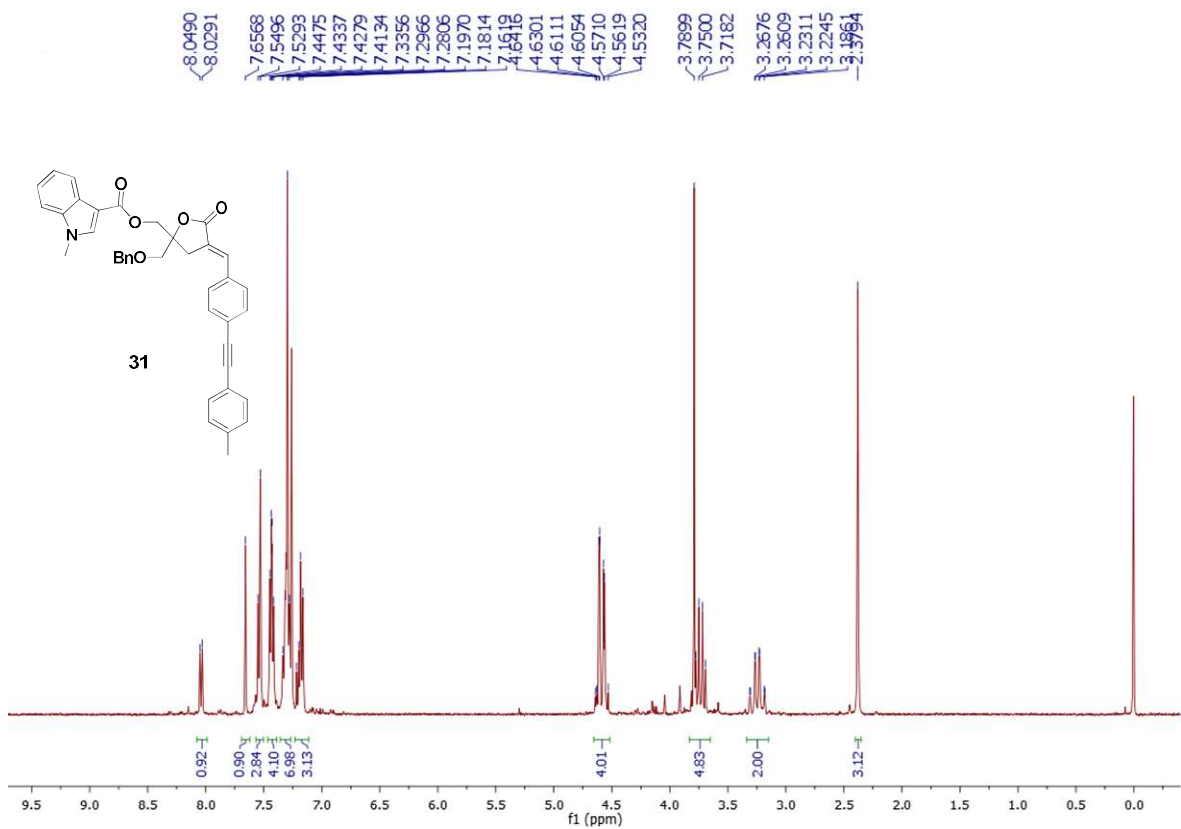

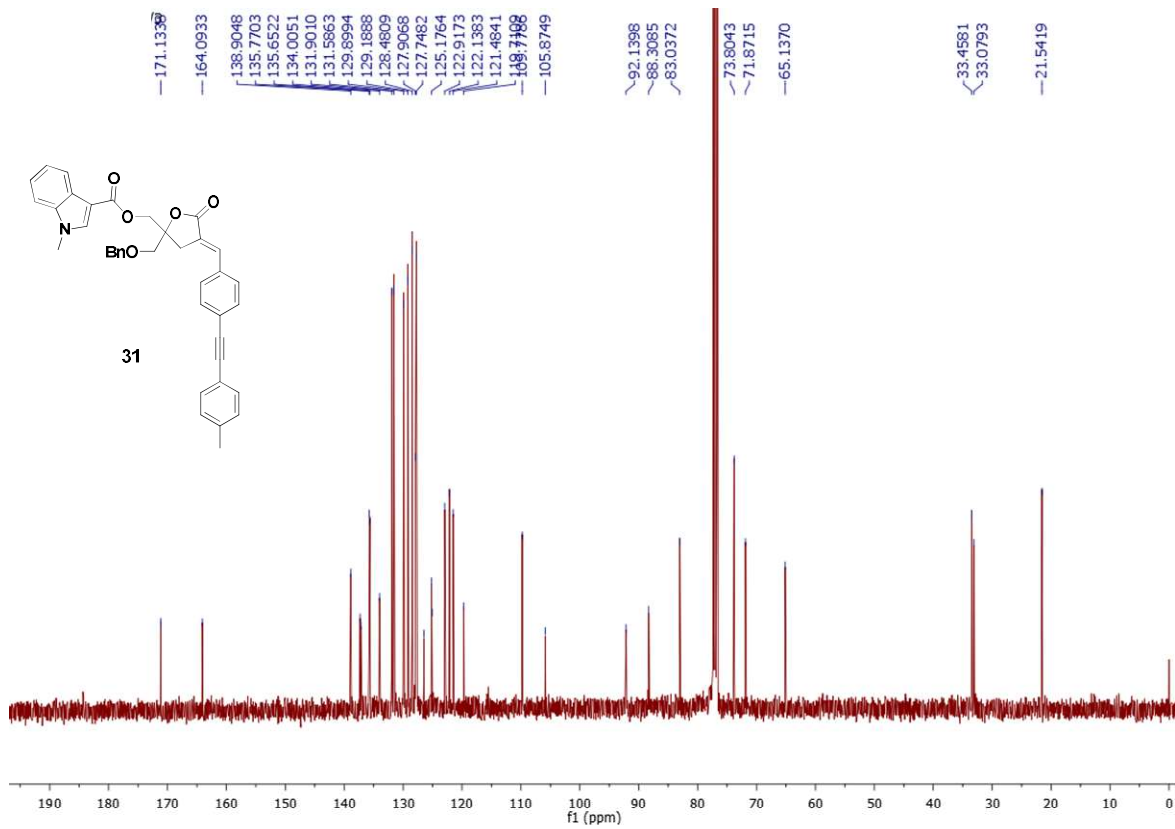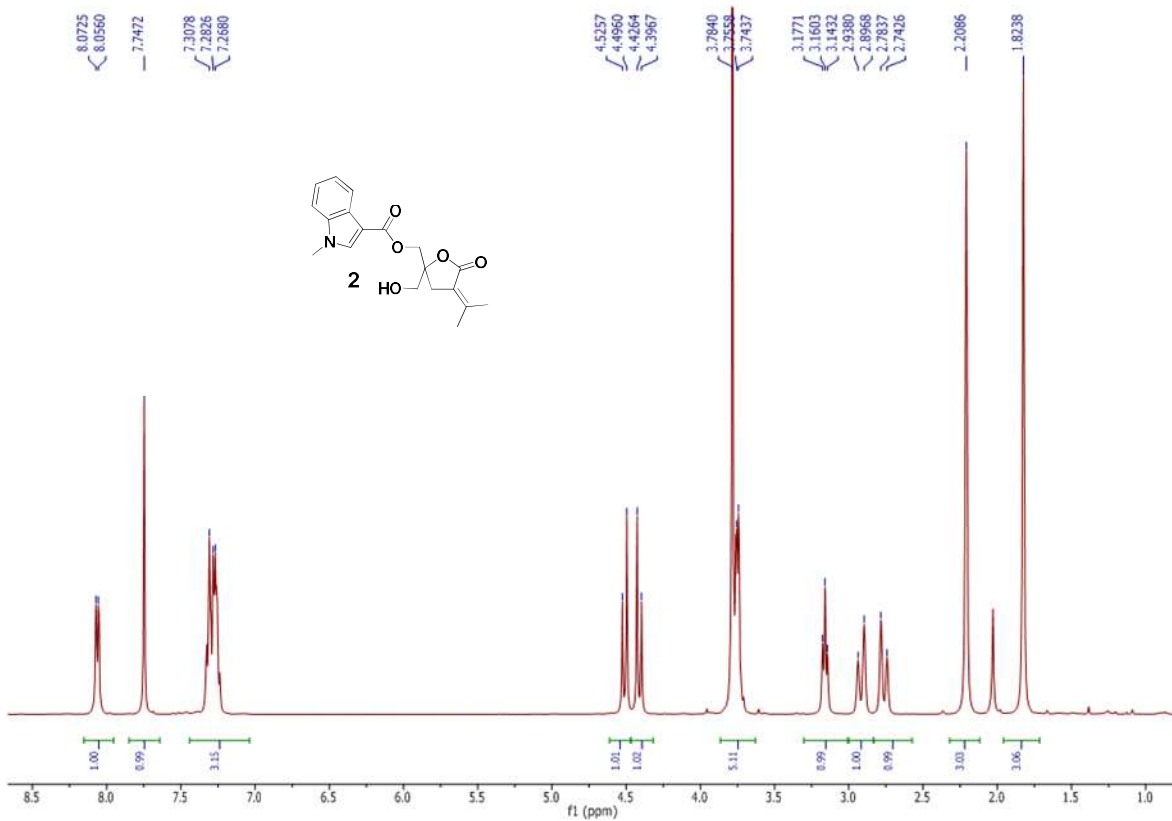

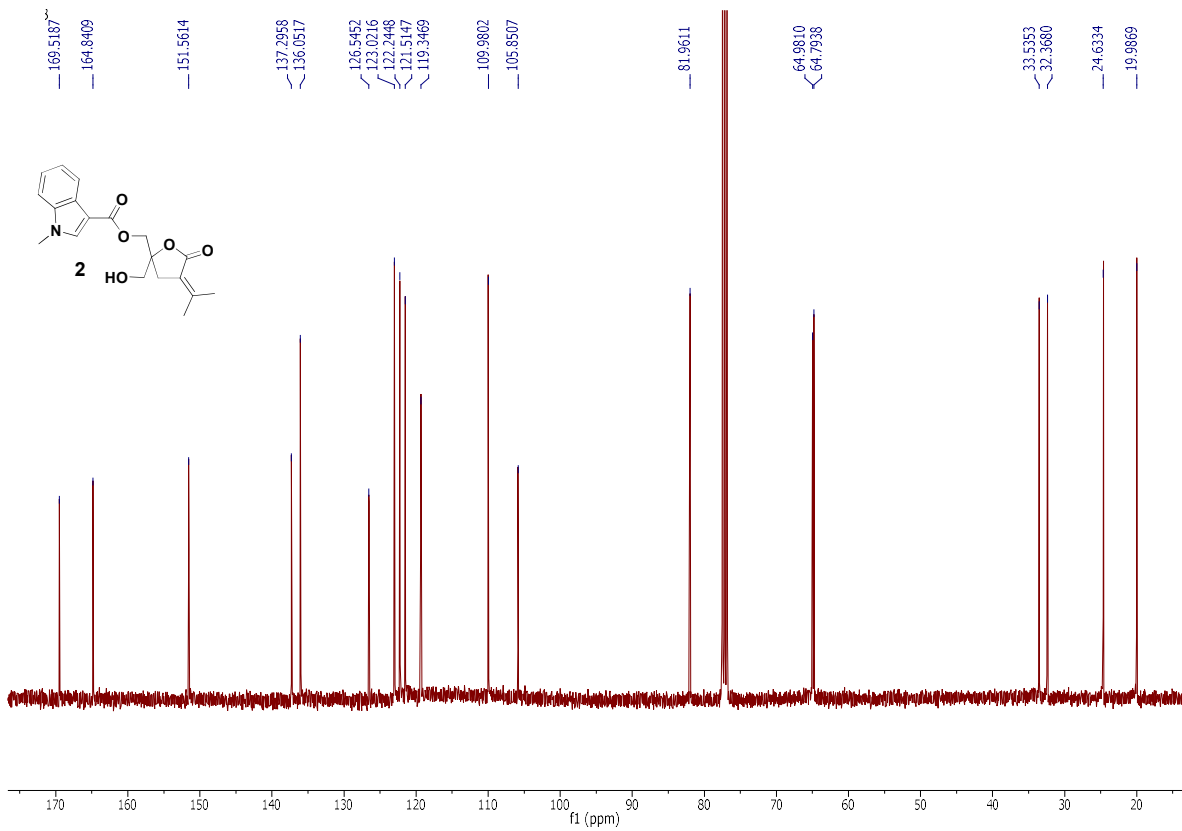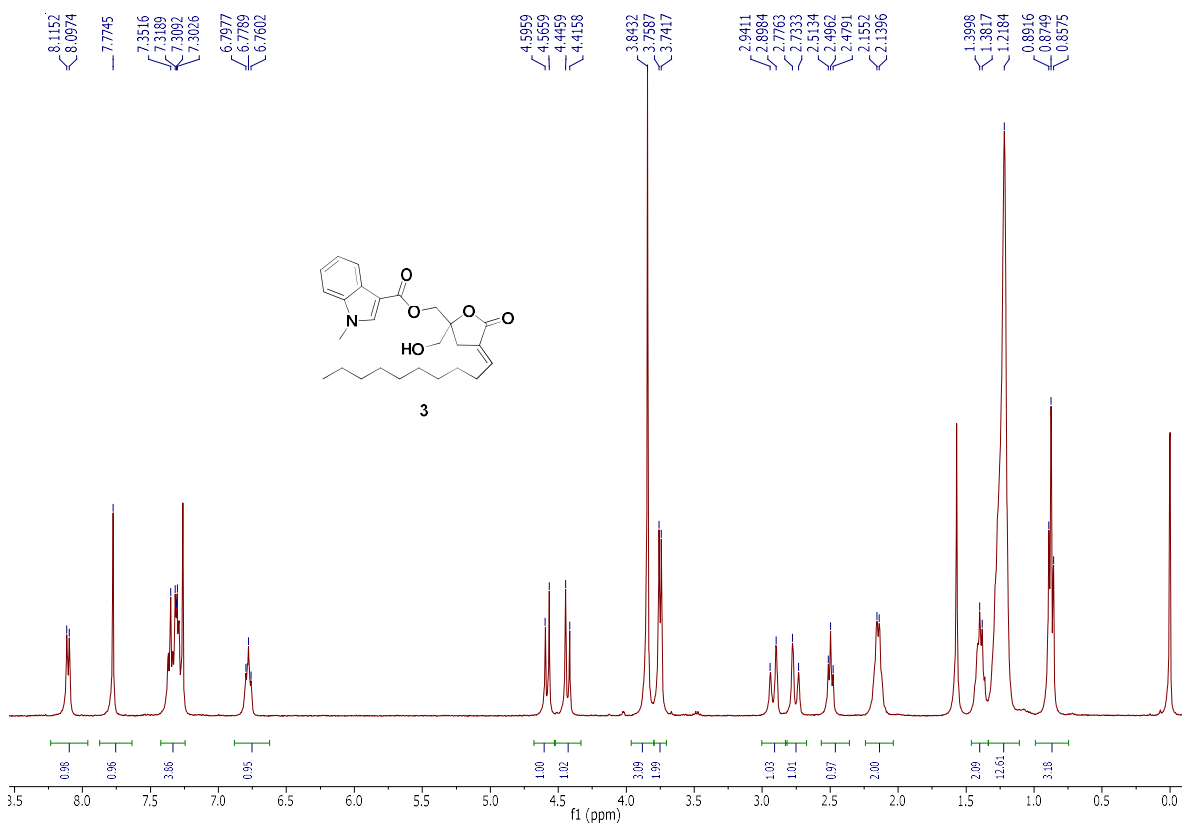



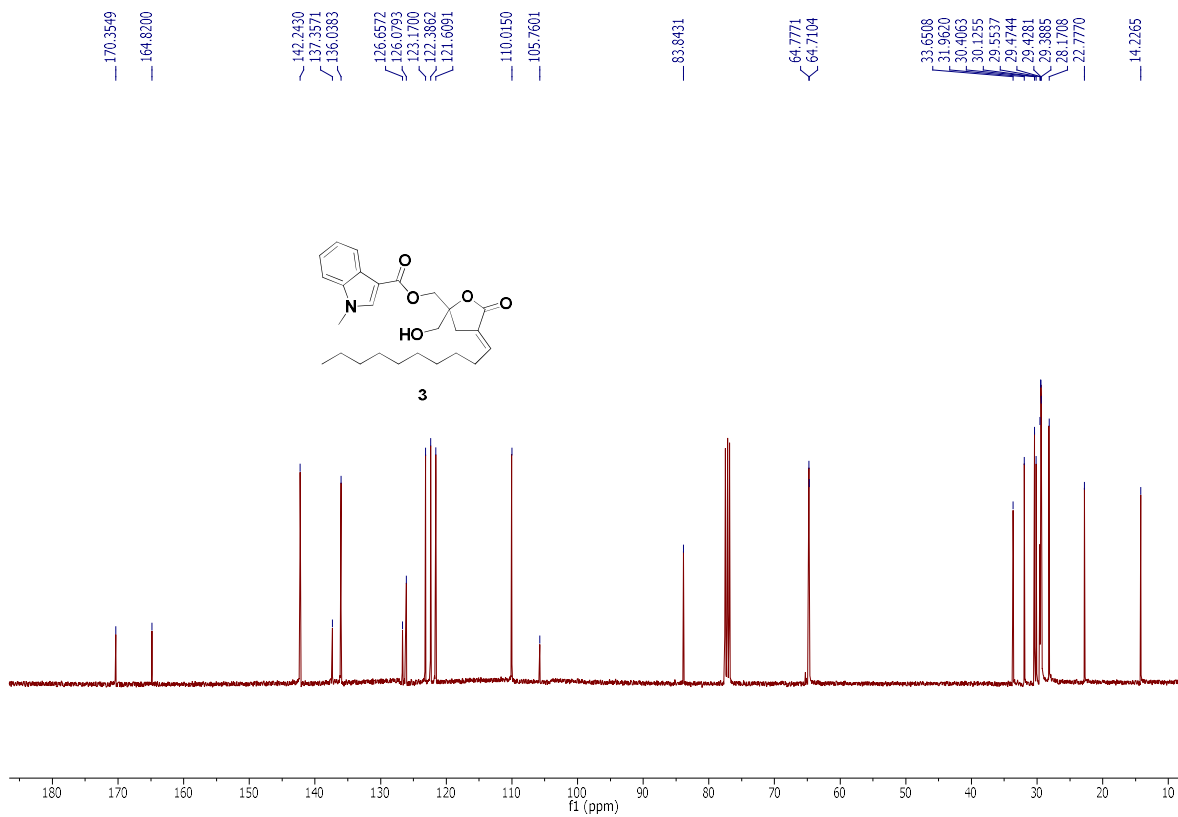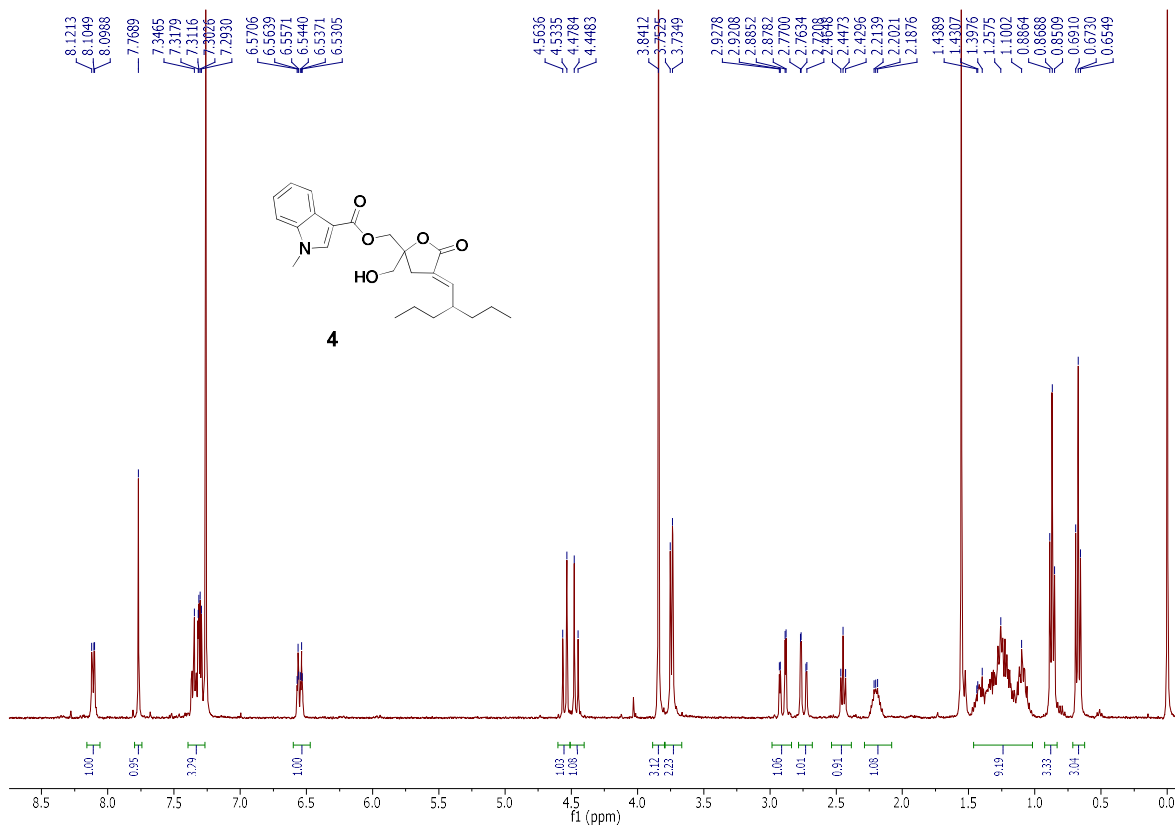

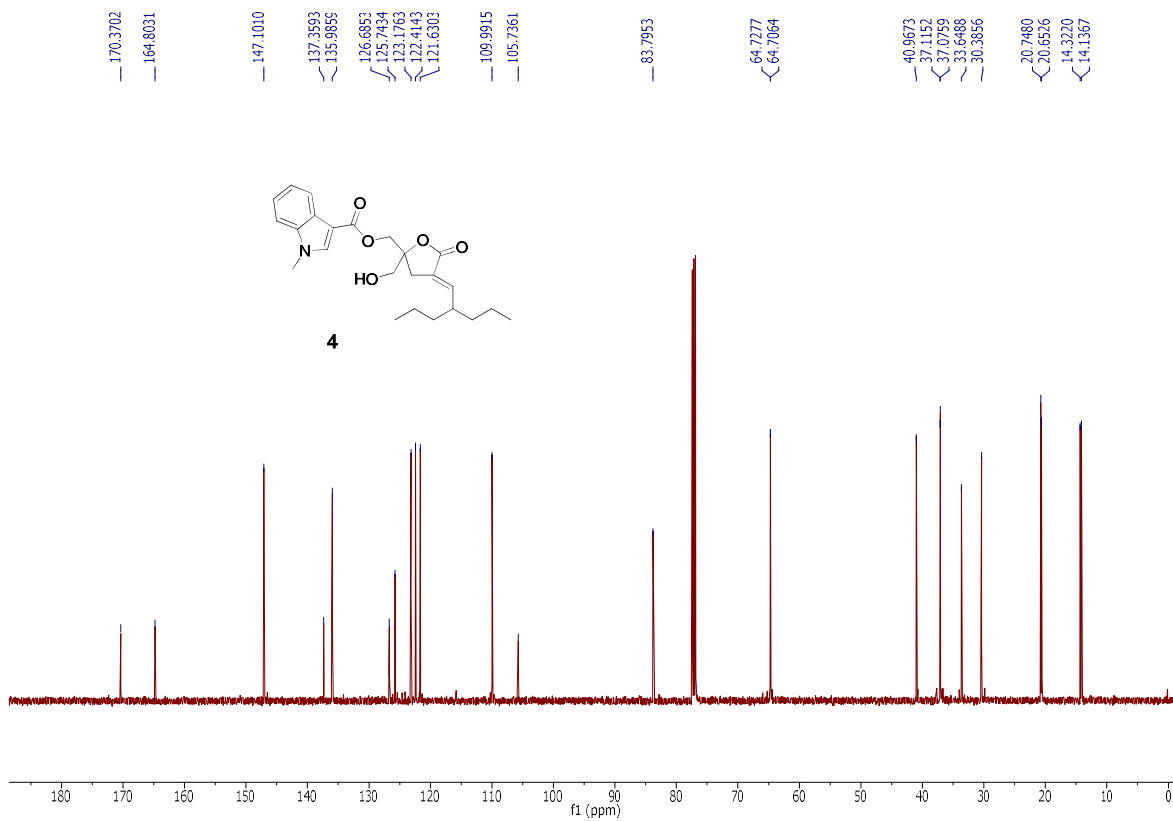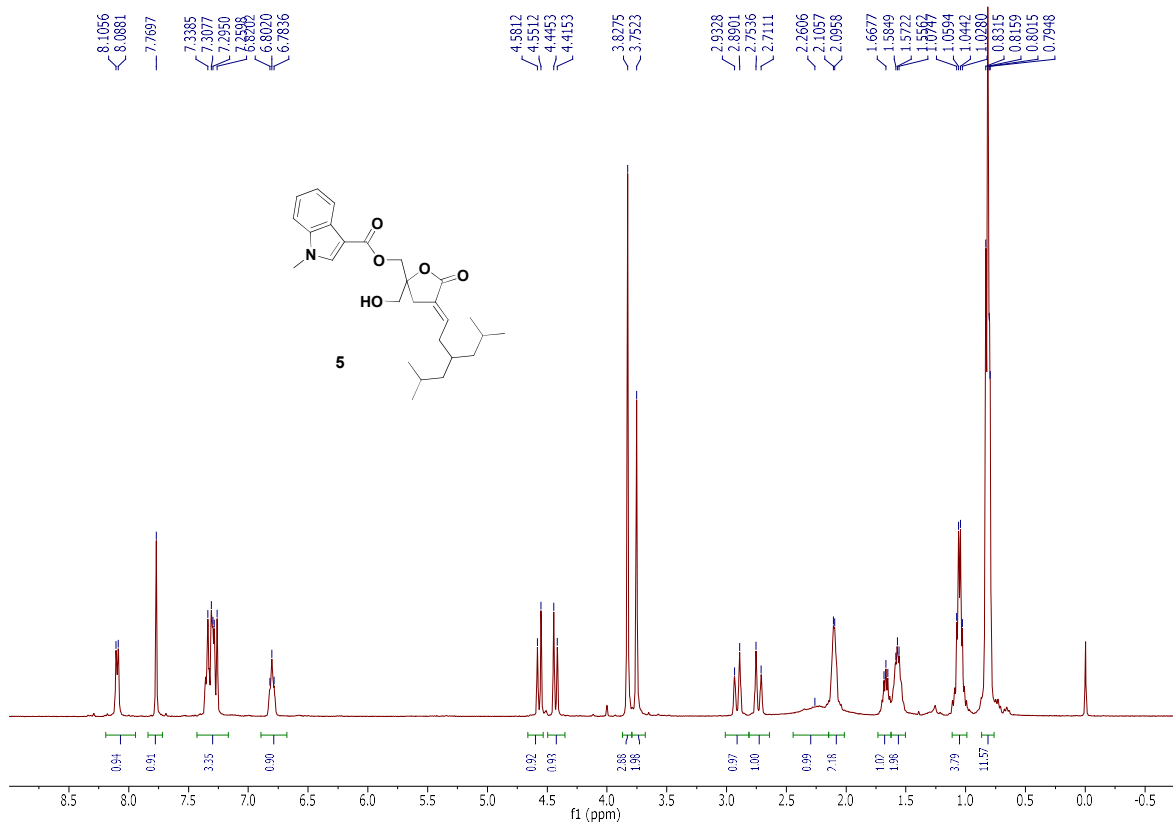

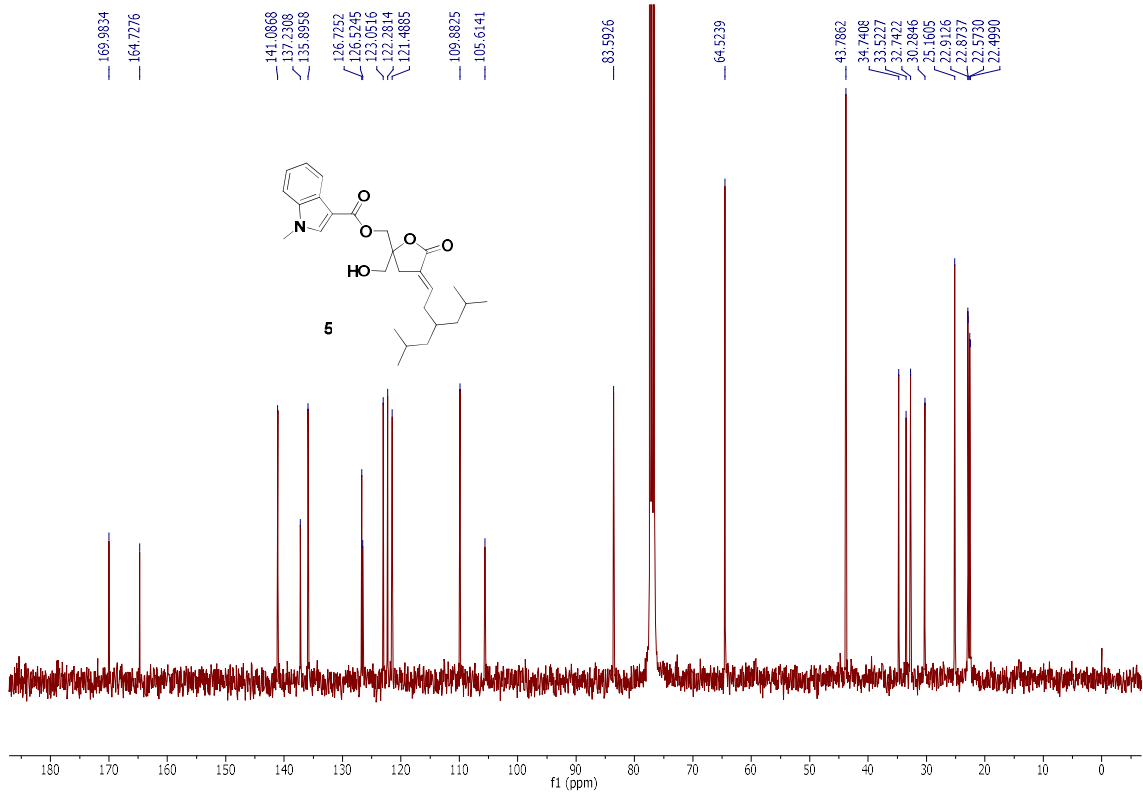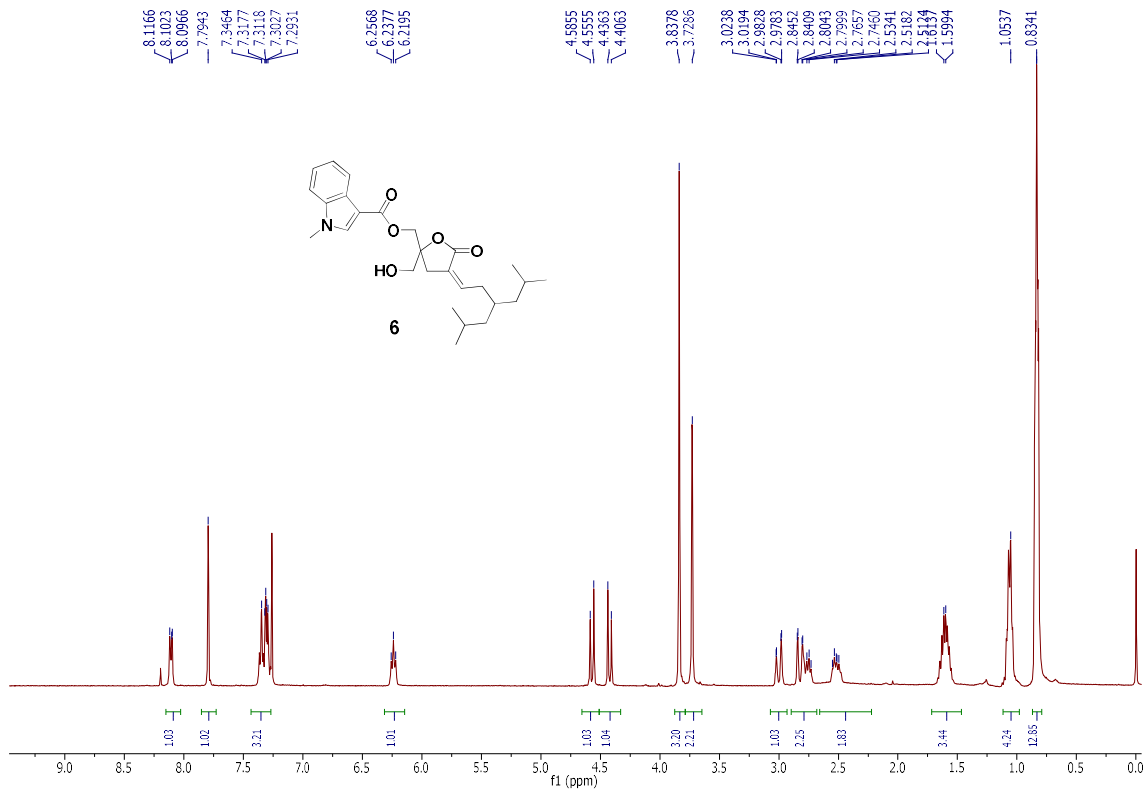

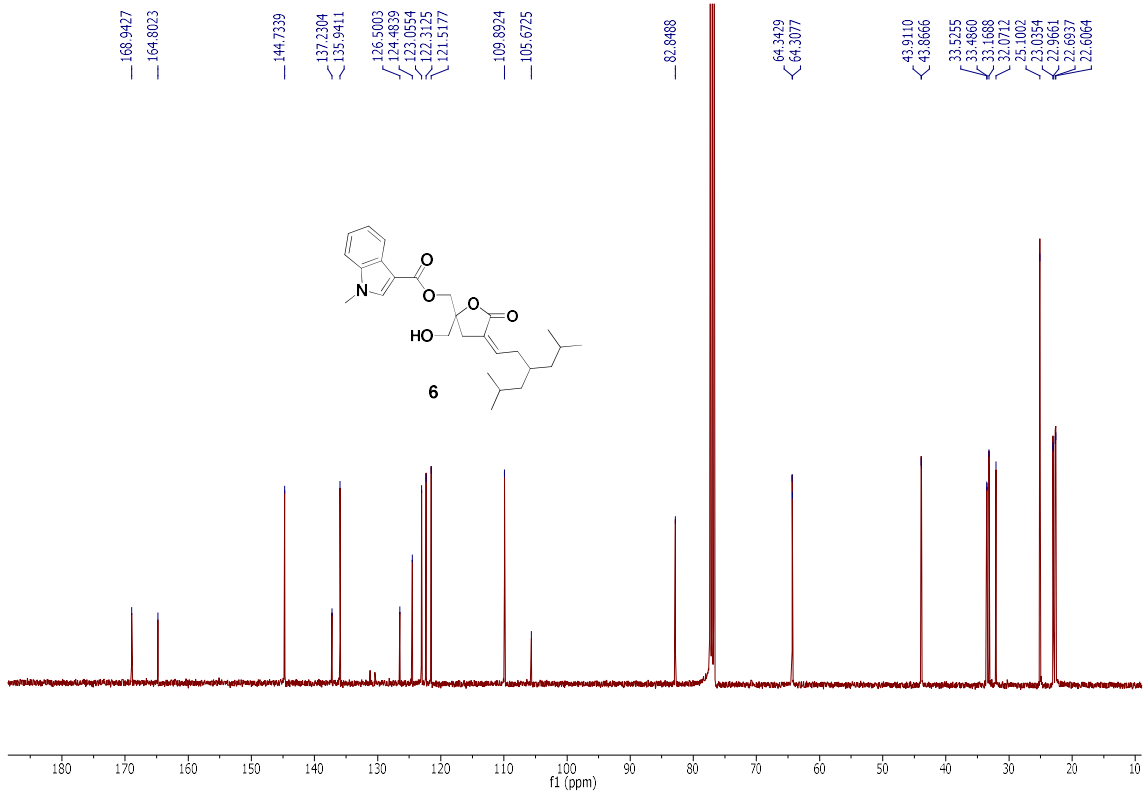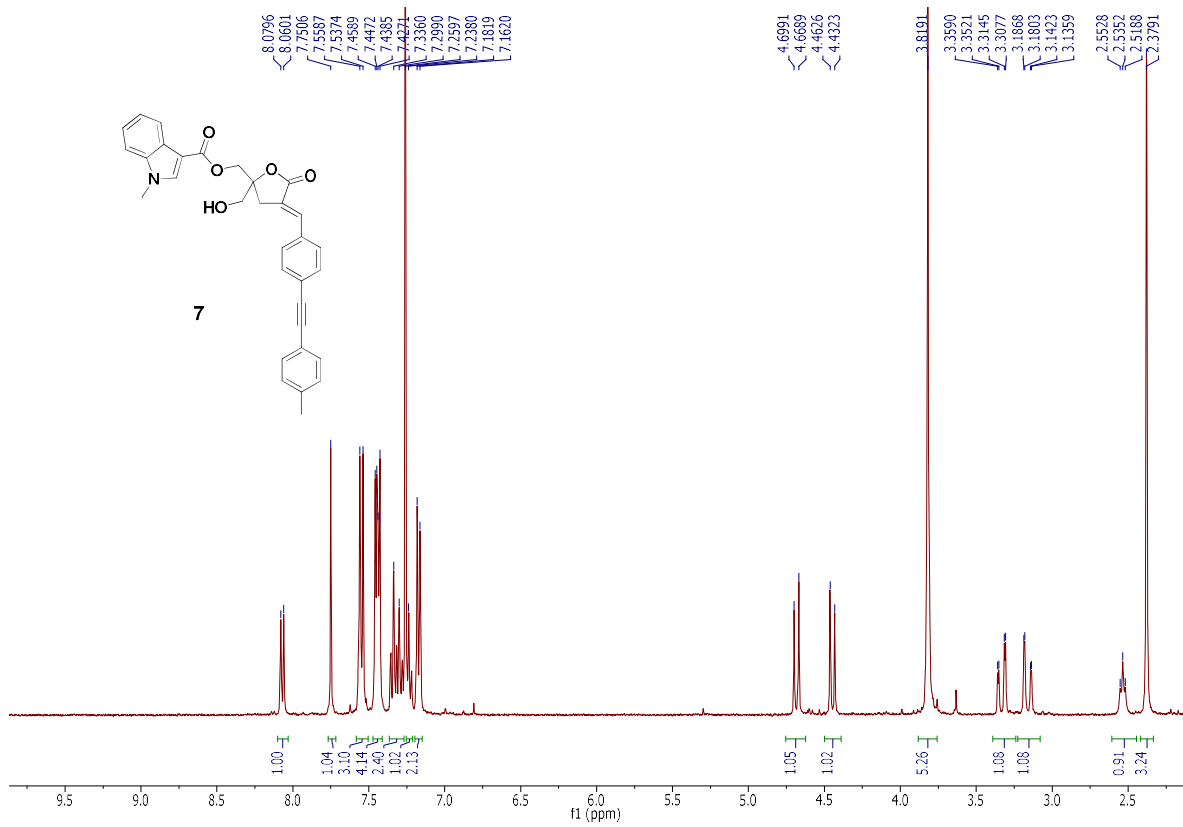

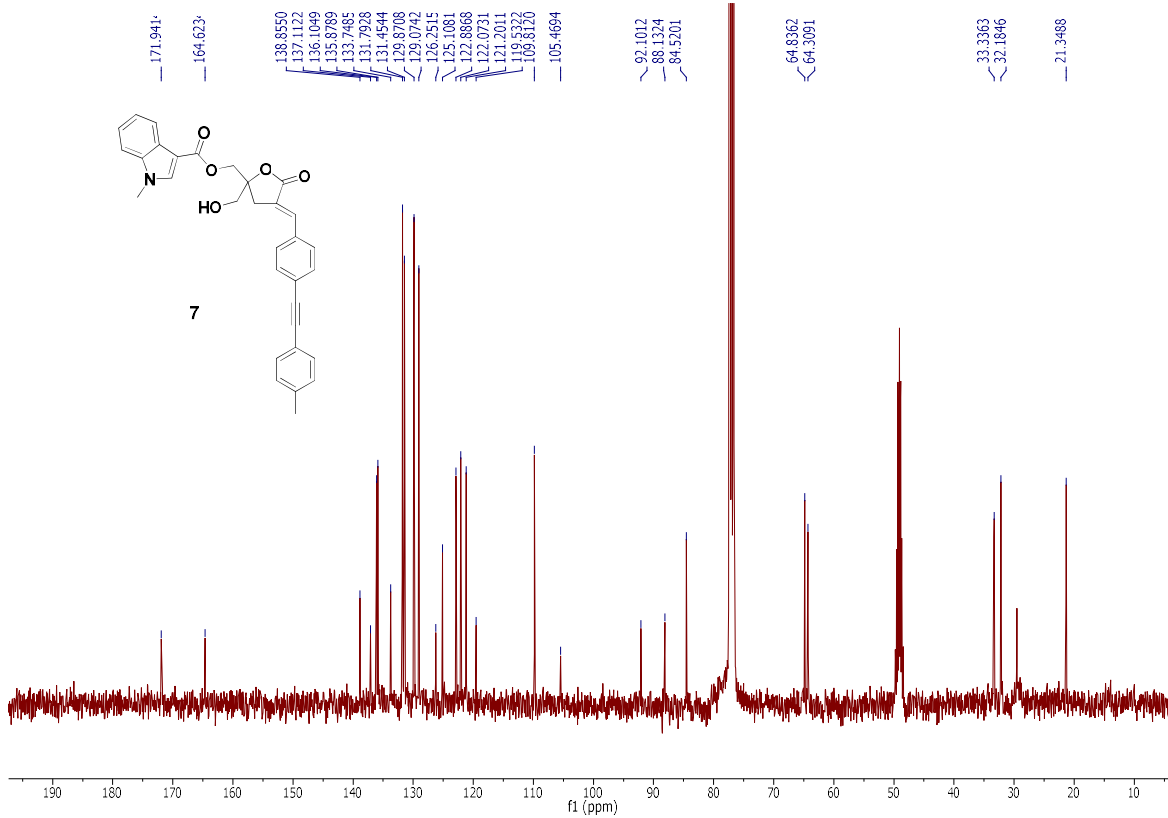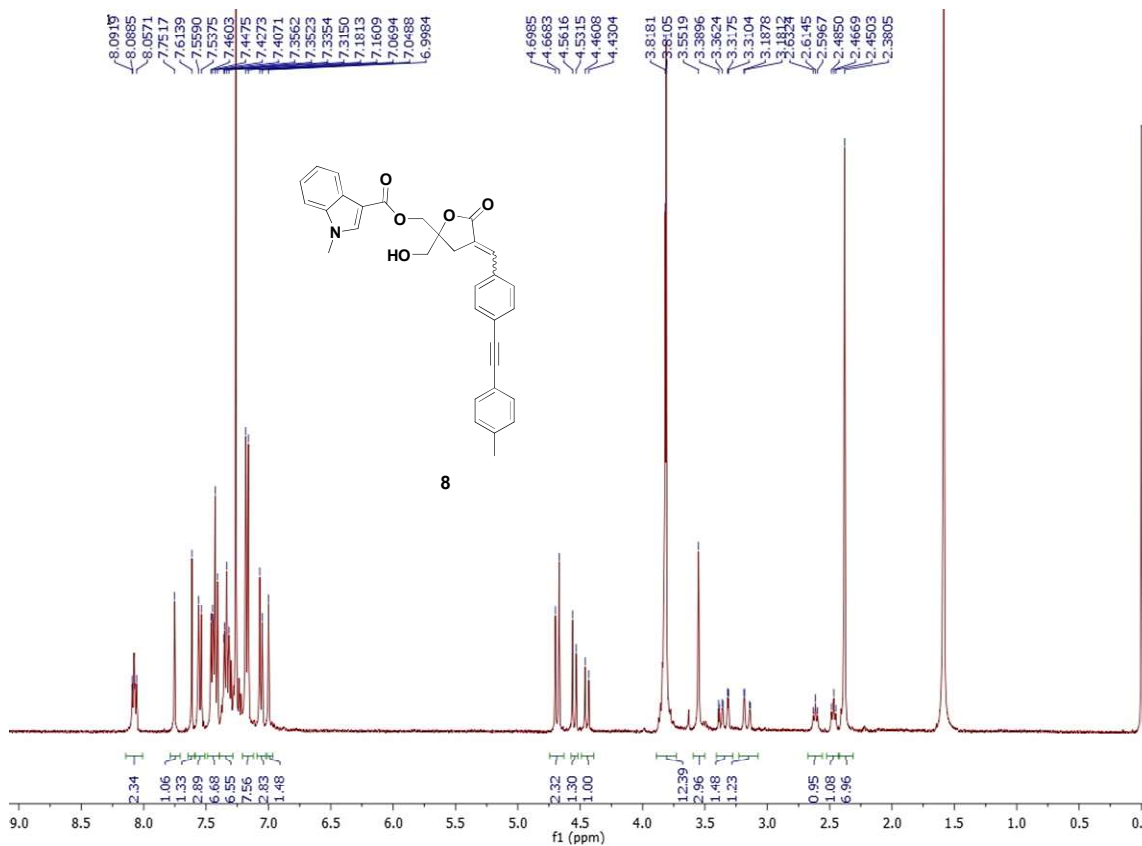

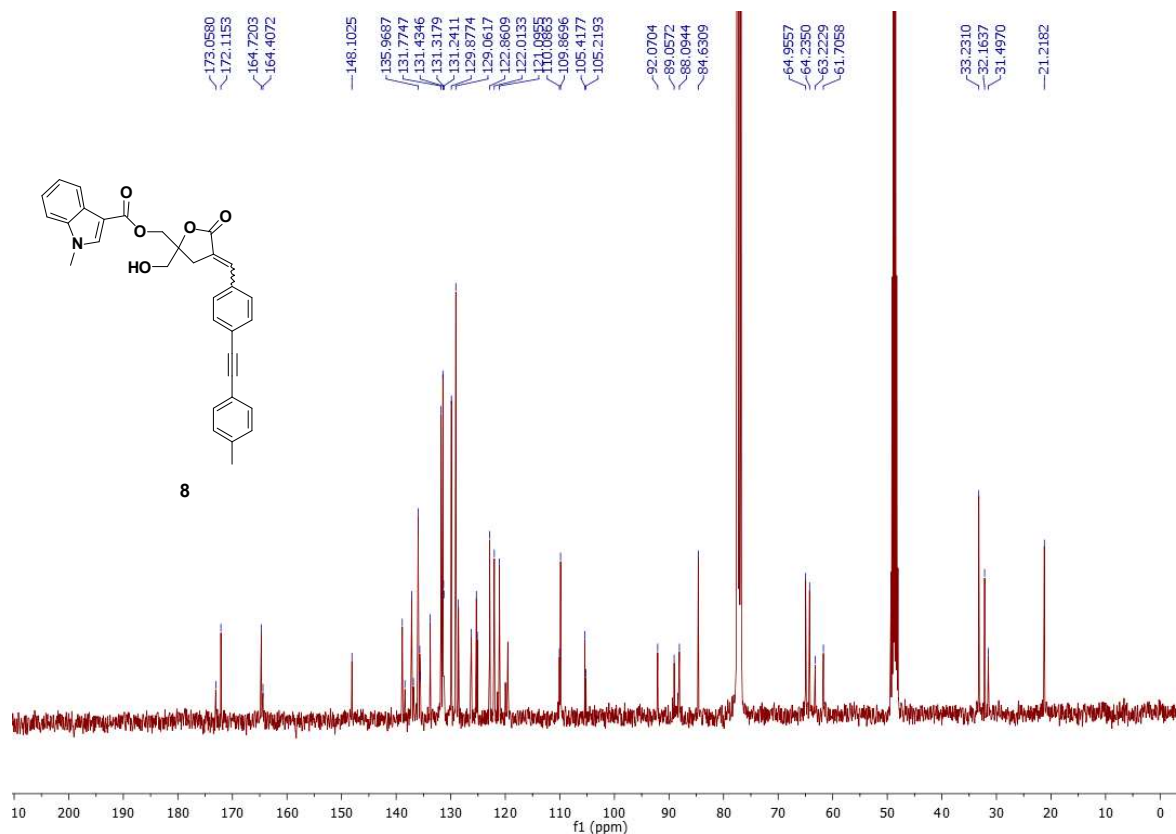

### HPLC Analysis of **20** (*E/Z*)

PDA-LC/MS analysis was performed on a Waters Alliance 2695 HPLC system with a PDA detector on a XTerra MS C18 column (Waters, Milford, MA, USA, 100 mm × 2.1 mm, 3.5 μm), attached to a Quattro Premier XE triple-quadrupole mass spectrometer (Waters, Milford, USA). The mobile phase A was H<sub>2</sub>O (0.1% formic acid) and the mobile phase B was acetonitrile (0.1% formic acid). Gradient elution was set as follows: 0–0.1 min, 32.5% to 73% B in 30 min. The mobile phase flow rate was set at 0.5 mL·min<sup>-1</sup>. The column temperature was kept at 40 °C.

(A)

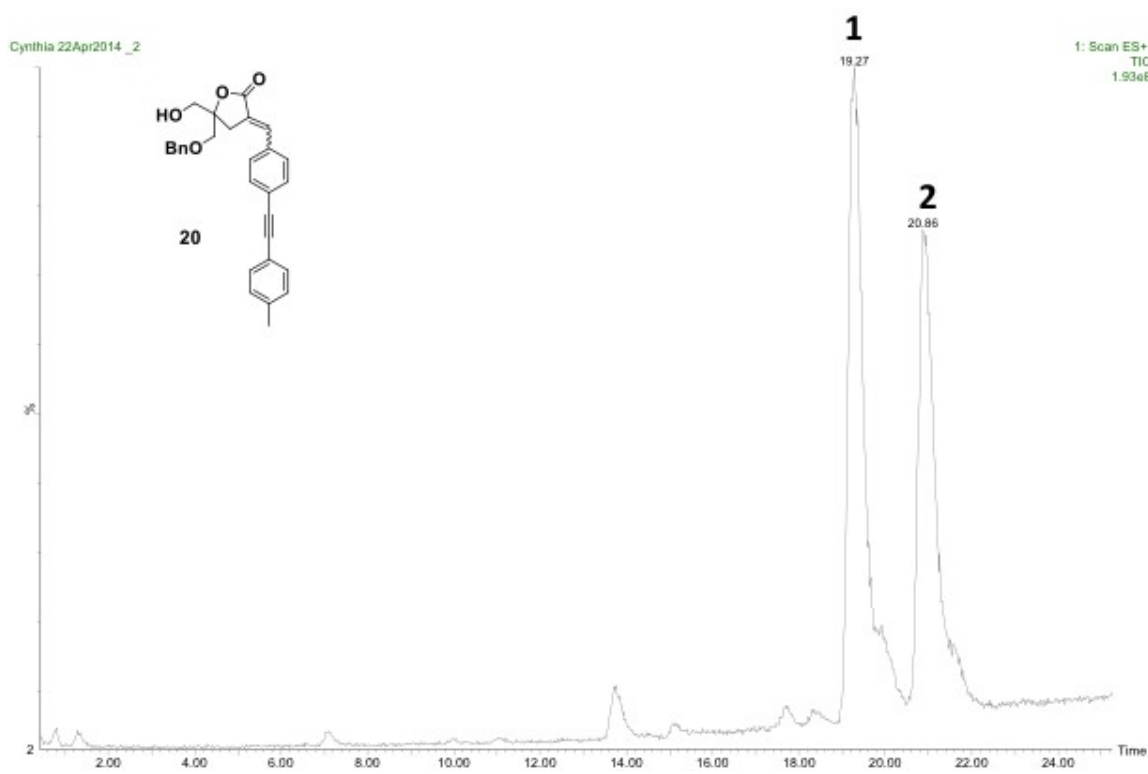

(B)

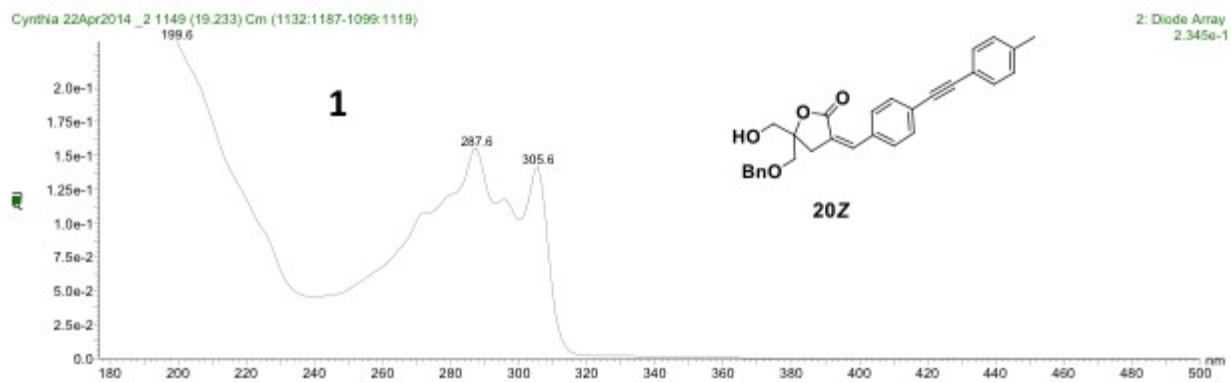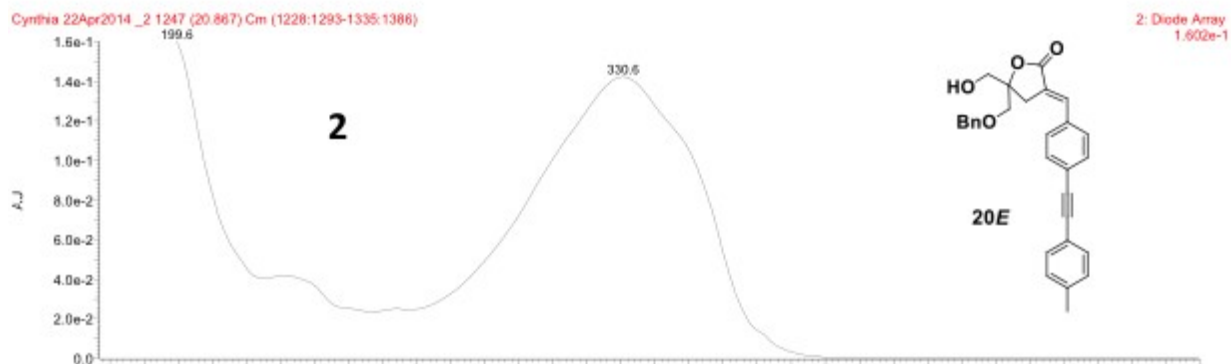

(C)

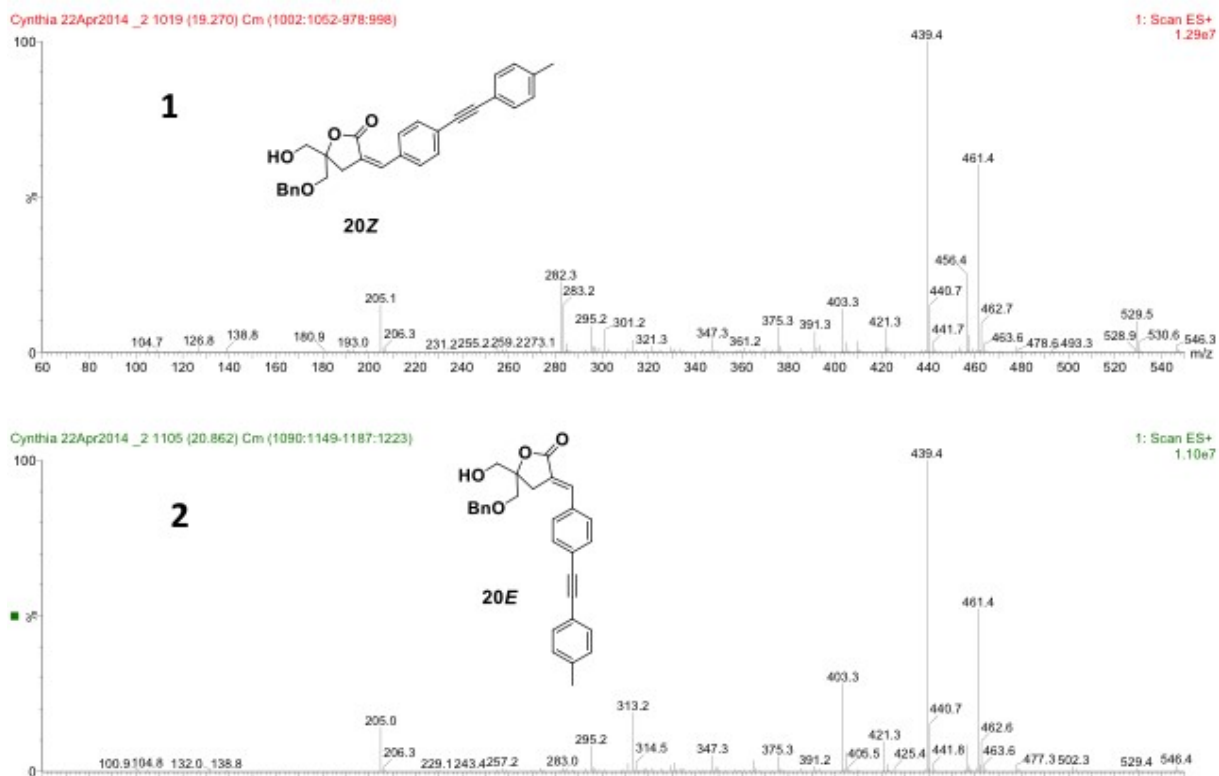

(A) HPLC-MS chromatogram of **20** (E/Z mixture). Retention times: peak **1**, 19.27 min; peak **2**, 20.86 min. (B) UV spectra: peak **1** corresponding to *Z* isomer and peak **2** corresponding to *E* isomer. (C) MS spectra of peak **1** and **2**. Both peaks showed the same  $(M+H)^+$  (439) and  $(M+Na)^+$  (461) species that are in agreement with the proposed structures. E/Z assignments from UV spectra were made by comparison with related compounds.
